# Supplementary material for: Mesoporous imine-based organic polymer: catalyst-free synthesis in water and application in CO2 conversion
Source: Royal Society of Chemistry journal article supplement (doi:10.1039/c8cc03346c), 2018-01-01

## Supporting Information

### Mesoporous Imine-Based Organic Polymer: Catalyst-Free Synthesis in Water and Application in CO<sub>2</sub> Conversion

Xiaoxiao Yu,<sup>‡a, b</sup> Zhenzhen Yang,<sup>‡a</sup> Shien Guo<sup>a, b</sup>, Zhenghui Liu,<sup>a, b</sup> Hongye Zhang,<sup>a</sup> Bo Yu,<sup>a</sup> Yanfei Zhao,<sup>a</sup> and Zhimin Liu<sup>\*a, b</sup>

<sup>a</sup> Beijing National Laboratory for Molecular Sciences, Key Laboratory of Colloid, Interface and Thermodynamics, Institute of Chemistry, Chinese Academy of Sciences, Beijing 100190, China

<sup>b</sup> University of Chinese Academy of Sciences, Beijing 100049, China.

E-mail: [liuzm@iccas.ac.cn](mailto:liuzm@iccas.ac.cn)

### Table of Contents

|                                       |    |
|---------------------------------------|----|
| 1. General experimental methods ..... | 3  |
| 2. Synthetic procedures.....          | 4  |
| 3. Supplementary Figure.....          | 6  |
| Figure S1 .....                       | 6  |
| Figure S2 .....                       | 7  |
| Figure S3 .....                       | 7  |
| Figure S4 .....                       | 8  |
| Figure S5 .....                       | 9  |
| Figure S6 .....                       | 9  |
| Figure S7 .....                       | 10 |
| Figure S8 .....                       | 10 |
| Figure S9 .....                       | 11 |
| Figure S10 .....                      | 11 |
| Table S1.....                         | 12 |
| Figure S11 .....                      | 13 |
| Scheme S1 .....                       | 13 |
| Scheme S2 .....                       | 14 |

|                                                                             |    |
|-----------------------------------------------------------------------------|----|
| 4. Determination of the product yields .....                                | 14 |
| Figure S12 .....                                                            | 14 |
| Figure S13 .....                                                            | 15 |
| Figure S14 .....                                                            | 16 |
| Figure S15 .....                                                            | 17 |
| Figure S16 .....                                                            | 18 |
| Figure S17 .....                                                            | 19 |
| Figure S18 .....                                                            | 20 |
| Figure S19 .....                                                            | 21 |
| Figure S20 .....                                                            | 22 |
| Figure S21 .....                                                            | 23 |
| Figure S22 .....                                                            | 24 |
| Figure S23 .....                                                            | 25 |
| Figure S24 .....                                                            | 26 |
| Figure S25 .....                                                            | 27 |
| Figure S26 .....                                                            | 28 |
| 5. $^1\text{H}$ and $^{13}\text{C}$ NMR data of the isolated products ..... | 29 |

# 1. General experimental methods

## Materials

All reagents and solvents were purchased from commercial sources and were used without further purification, unless indicated otherwise.

## Instrumentation

Liquid  $^1\text{H}$  and  $^{13}\text{C}$  NMR spectra were recorded on Bruker 400 spectrometer. Solid-state NMR experiments were performed on a Bruker WB Avance II 400 MHz spectrometer. The  $^{13}\text{C}$  CP/MAS NMR spectra were recorded with a 4-mm double-resonance MAS probe and with a sample spinning rate of 10.0 kHz; a contact time of 2 ms (ramp 100) and pulse delay of 3 s were applied. FTIR spectra of the samples were collected on a TENSOR 27 FTIR at a resolution of  $2\text{ cm}^{-1}$ . Gas sorption isotherms were obtained with Micromeritics TriStar II 3020 and Micromeritics ASAP 2020 M+C accelerated surface area and porosimetry analyzers at certain temperature. The samples were outgassed at  $140\text{ }^\circ\text{C}$  for 8 h before the measurements. Surface areas were calculated from the adsorption data using Brunauer-Emmett-Teller (BET) methods. The pore-size-distribution curves were obtained from the adsorption branches using non-local density functional theory (NLDFT) method. Field emission scanning electron microscopy (SEM) observations were performed on a Hitachi SU8020 microscope operated at an accelerating voltage of 15.0 kV. (HR) Transmission electron microscopy (TEM) images were obtained with a JEOL JEM-1011 and JEM-2100F instrument operated at 200 kV. The thermal properties of the materials were evaluated using a thermogravimetric analysis (TGA) instrument (STA PT1600 Linseis) over the temperature range of 25 to  $800\text{ }^\circ\text{C}$  under air with a heating rate of  $10\text{ }^\circ\text{C}/\text{min}$ . X-ray photoelectron spectroscopy (XPS) was performed on an ESCAL Lab 220i-XL spectrometer at a pressure of  $\sim 3 \times 10^{-9}$  mbar (1 mbar = 100 Pa) using Al K $\alpha$  as the excitation source (1486.6 eV) and operated at 15 kV and 20 mA. The binding energies were referenced to the C $_{1s}$  line at 284.8 eV from adventitious carbon. The XRD analysis was performed on a D/MAX-RC diffractometer operating at 30 kV and 100 mA with Cu K $\alpha$  radiation. The reaction mixture was analyzed by means of GC (Agilent 4890D) with a FID detector and a polar capillary column (HP-INNOWAX) ( $30\text{ m} \times 0.25\text{ mm} \times 0.25\text{ }\mu\text{m}$ ). The column oven was temperature-programmed with a 2 min initial hold at 323 K, followed by the temperature increase to 538 K at a rate of 20 K/min and kept at 538 K for 10 min. High purity nitrogen was used as a carrier gas.

## 2. Synthetic procedures

### (1) Synthetic procedure for Imine-POP

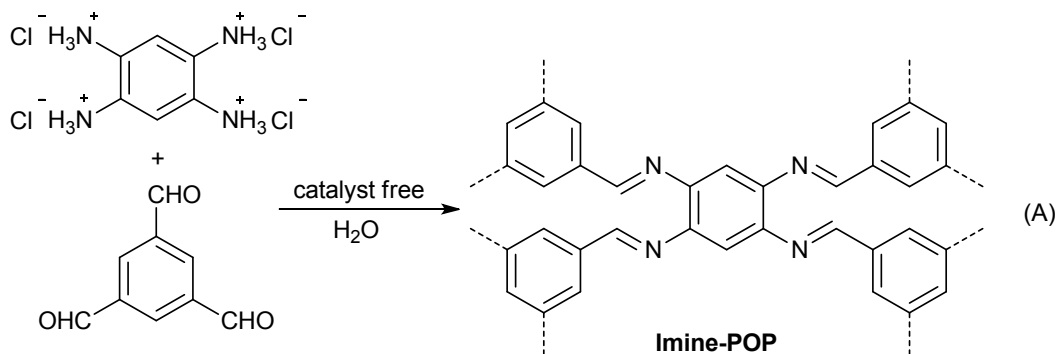

Typically, 1,2,4,5-benzenetetramine tetrahydrochloride (1 mmol), benzene-1,3,5-tricarbaldehyde (1.3 mmol) and H<sub>2</sub>O (50 mL) were added successively to a 100 mL autoclave with a Teflon inner tube. The mixture was stirred at 25 °C for 2 h and then 120 °C for 24 h. After cooling to room temperature, the solid was collected by filtration and washed by distilled water, tetrahydrofuran (THF) and ethanol (100 mL\*3 for each liquid). After extracted in a Soxhlet extractor with methanol (70 mL), H<sub>2</sub>O (70 mL) and THF (70 mL) for 48 h, the sample was collected and dried in vacuum oven at 140 °C for 24 h. The sample, denoted as **Imine-POP**, was brown solid, and its yield was 85% .

### (2) Reaction of the monomers to produce N,N-dibenzylidenebenzene-1,2-diamine

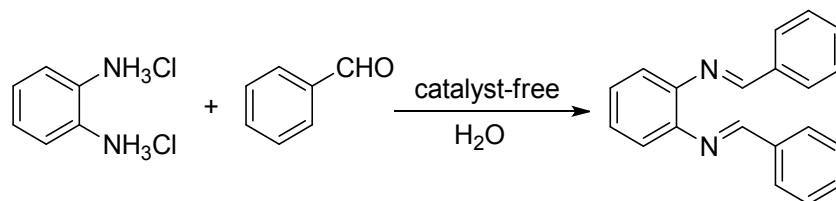

1,2-Benzenediamine dihydrochloride (1 mmol), benzaldehyde (2 mmol) and H<sub>2</sub>O (50 mL) were added successively to a 100 mL autoclave with a Teflon inner tube. The mixture was stirred at 25 °C for 2 h and then 120 °C for 24 h. After cooling to room temperature, the reaction system was extracted with chloroform (100 mL\*2). The solvent was partly removed by rotary evaporation, and the residue was detected by GC-MS as shown below, indicating the formation of N,N-dibenzylidenebenzene-1,2-diamine.

## GC spectrum

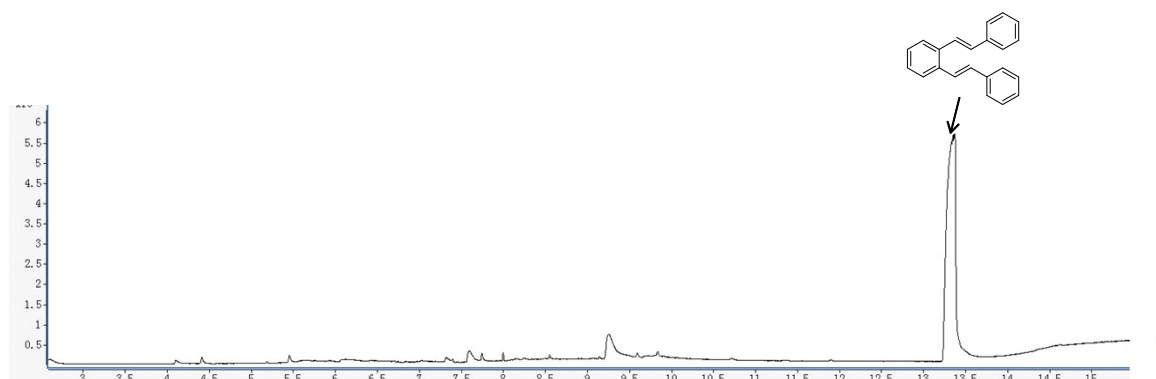

## MS spectrum

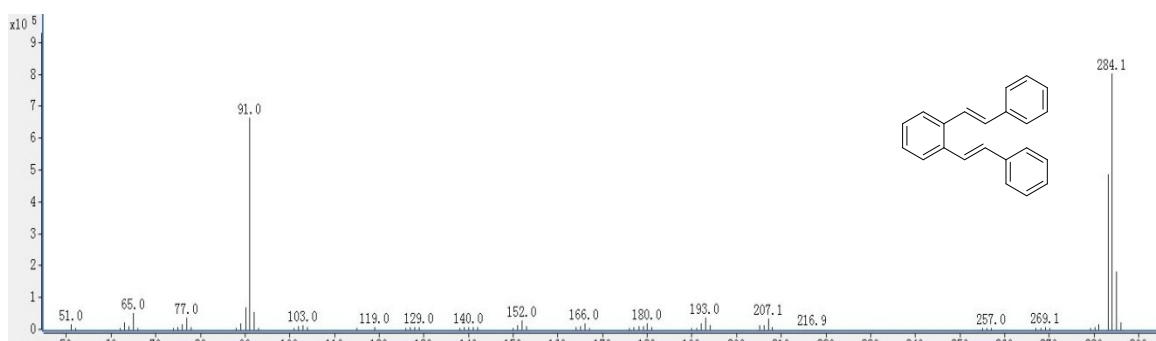

### (3) Synthetic procedure for Imine-POP@Pd

To an  $\text{CH}_2\text{Cl}_2$  (10 mL) dispersion of **Imine-POP** (0.1 g), 2 mL of  $\text{CH}_2\text{Cl}_2$  solution of  $\text{Pd}(\text{OAc})_2$  (0.03 g, 0.13 mmol) was added under  $\text{N}_2$  atmosphere and stirred for 12 h at room temperature. Then the solid was filtered, washed with dichloromethane (10\*25 mL) and dried under vacuum at 60 °C for 24 h. The resultant sample was denoted as **Imine-POP@Pd**. The  **$\text{Al}_2\text{O}_3$ @Pd**,  **$\text{TiO}_2$ @Pd** and  **$\text{C@Pd}$**  were prepared in the same way using various supports.

### (4) General procedure for the N-formylation reaction

Typically, amine (i.e., **1a-1n**, 1 mmol), **Imine-POP@Pd** (30 mg),  $\text{K}_3\text{PO}_4$  (0.3 mmol) and DMI (4 mL) were successively added into a stainless steel autoclave with a Teflon tube (25 mL inner volume) under  $\text{N}_2$  atmosphere. The autoclave was sealed and charged with  $\text{CO}_2$  up to 3 MPa and then  $\text{H}_2$  to total pressure of 6 MPa at room temperature. The autoclave was moved to an oil bath of 100 °C and stirred for 24 h. After reaction, the autoclave was cooled down to room temperature. The yield of **2a** was determined by GC using biphenyl as an internal standard, and the yields of **2b-2n** were determined by NMR using  $\text{CH}_3\text{NO}_2$  as an internal standard and  $\text{CDCl}_3$  as the solvent.

### (5) Isolation of the products

After reaction, the catalyst was removed by filtration, and the filtrate was collected into separating funnel.  $\text{H}_2\text{O}$  (4 mL), which has good miscibility with DMI, and ethyl acetate (4 mL), which can solve the product well, were added into the separating funnel. The  $\text{H}_2\text{O}$  layer was extracted by ethyl acetate (4 mL \*5) and all the ethyl acetate solution of the product was gathered and dried by  $\text{Na}_2\text{SO}_4$ . The

solvent was removed by rotary evaporateion and the pure product was obtained by column chromatography on silica gel using n-hexane/ethyl acetate as eluent.

#### (6) Recycling of Imine-POP@Pd

After reaction, the catalyst was separated by centrifugation, washed with dichloromethane, ethanol, deionized water, ethanol successively and then dried under vacuum at 60 °C for 24 h. The recycled catalyst was reused for the next run.

### 3. Supplementary Figure

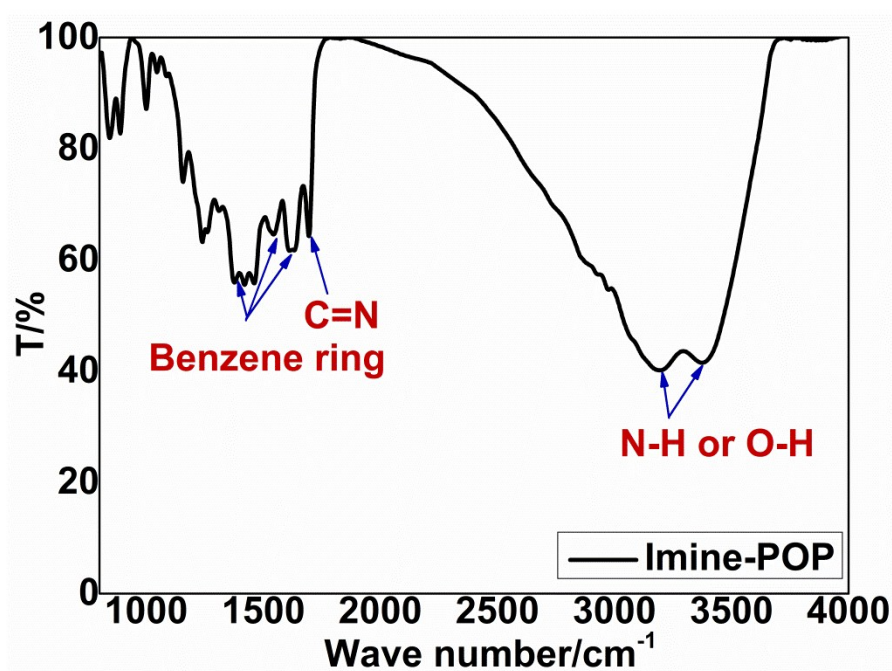

**Figure S1** FTIR spectrum of **Imine-POP**. The spectrum was recorded as KBr pellets.

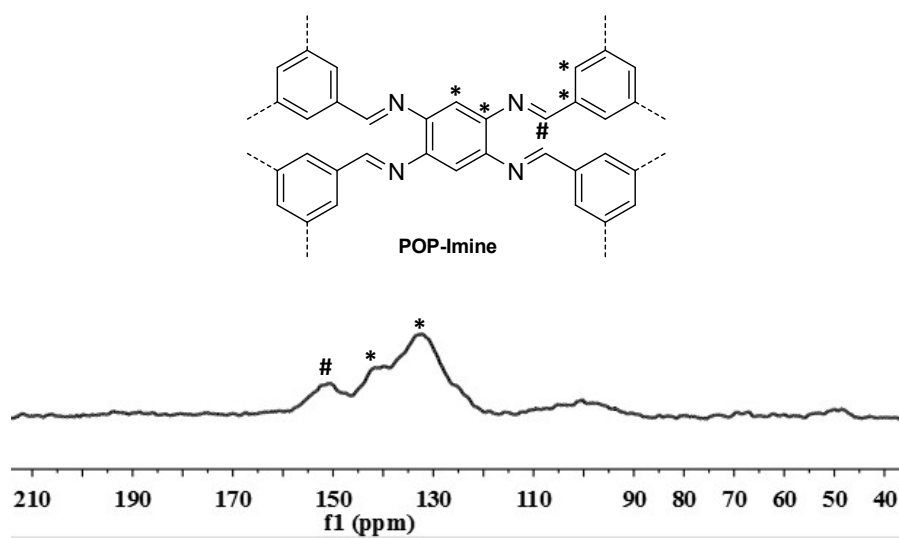

**Figure S2** CP/MAS  $^{13}\text{C}$  NMR spectrum for Imine-POP.

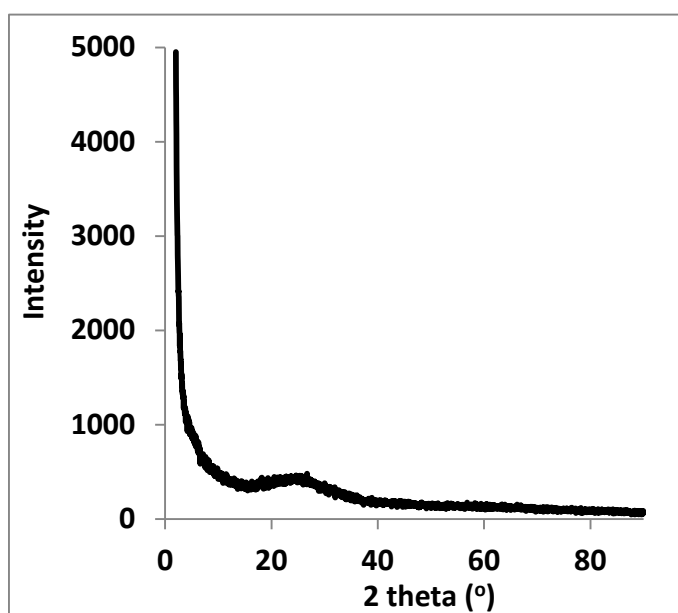

**Figure S3** PXRD-pattern of Imine-POP.

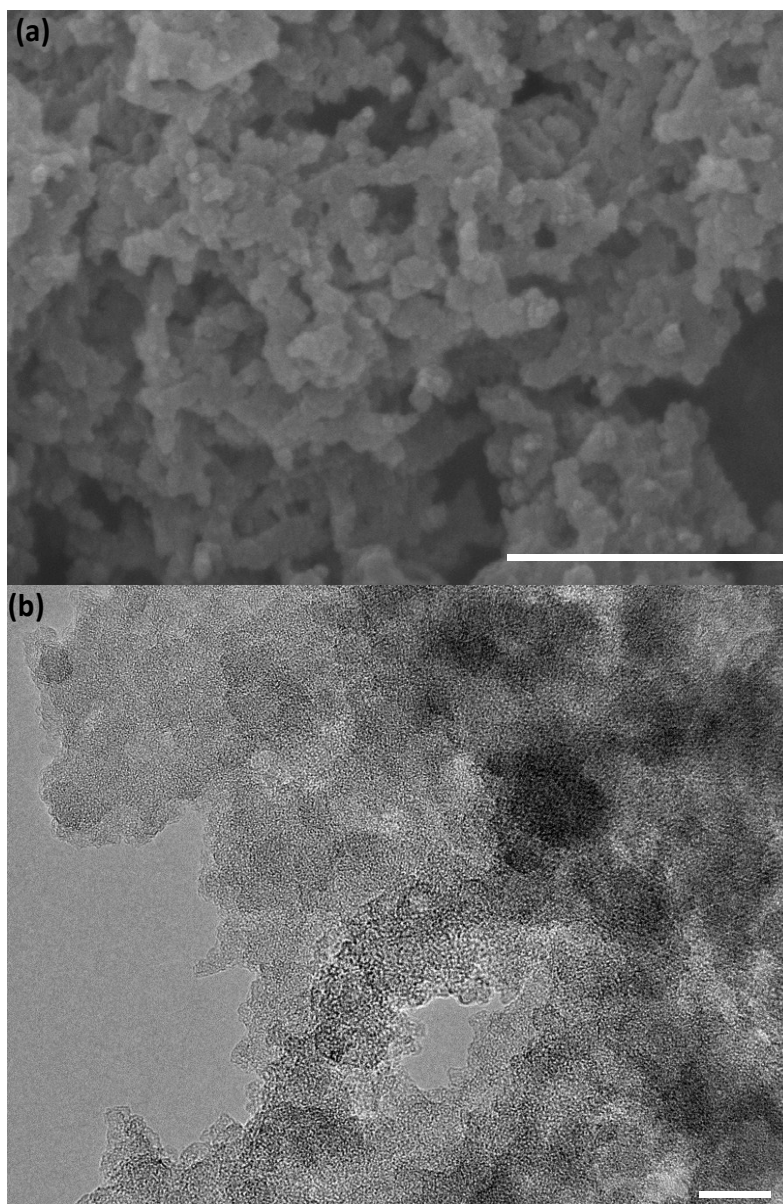

**Figure S4** (a) SEM and (b) TEM image of **Imine-POP**. Scale bar, (a) 300 nm, (b) 20 nm.

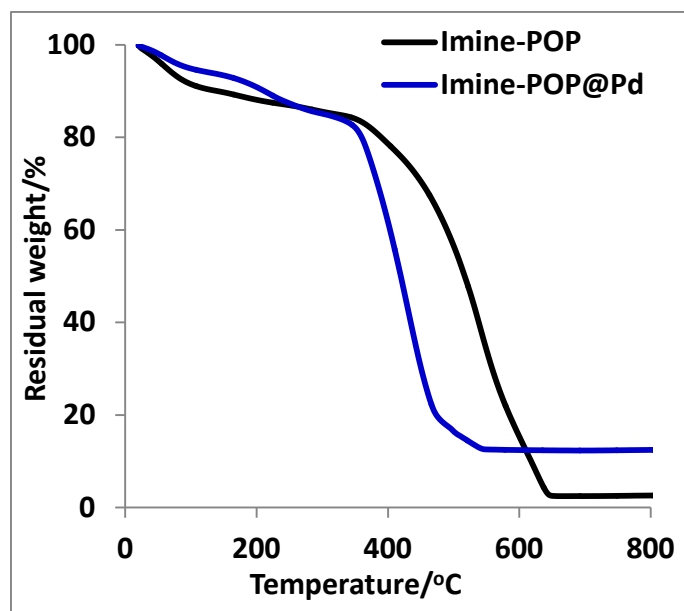

**Figure S5** TGA analysis on **Imine-POP** and **Imine-POP@Pd** in air, with a ramping rate of 10 °C min.

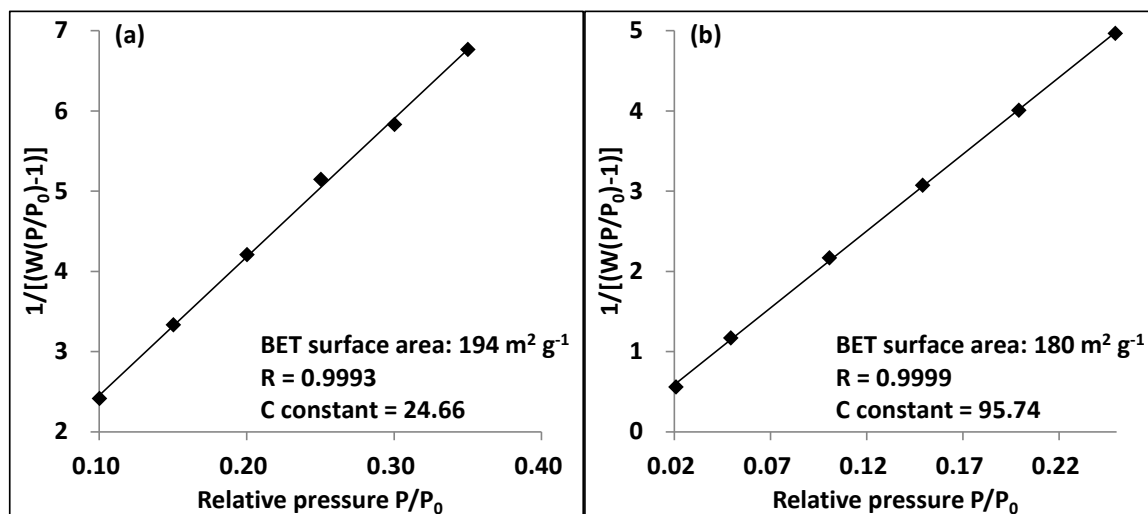

**Figure S6** BET plots of (a) **Imine-POP** and (b) **Imine-POP@Pd**.

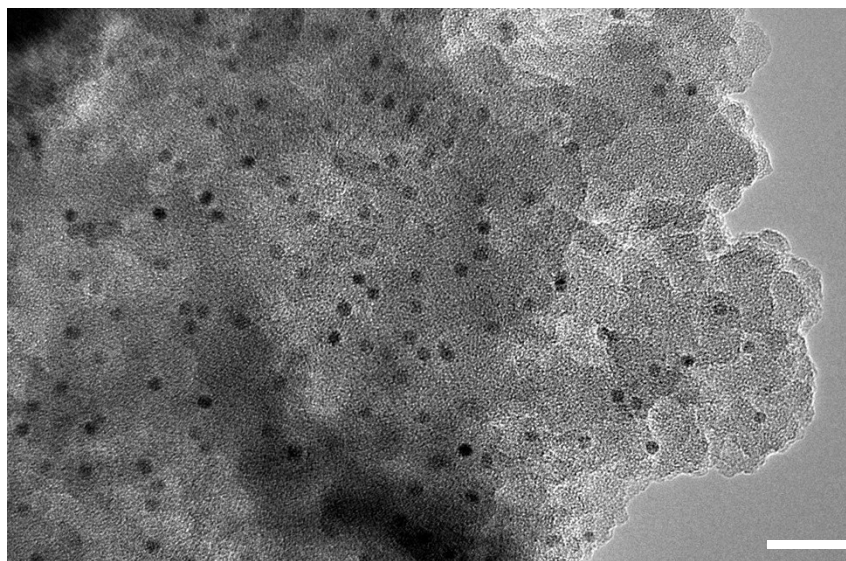

**Figure S7** (HR)TEM of Imine-POP@Pd, Scale bar 25 nm.

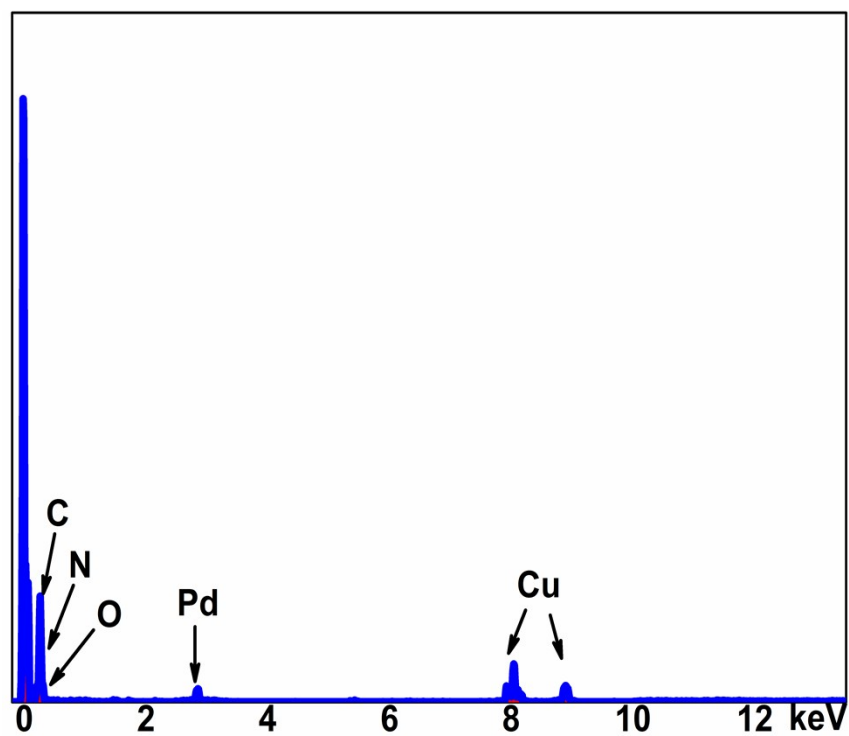

**Figure S8** EDS profile of Imine-POP@Pd

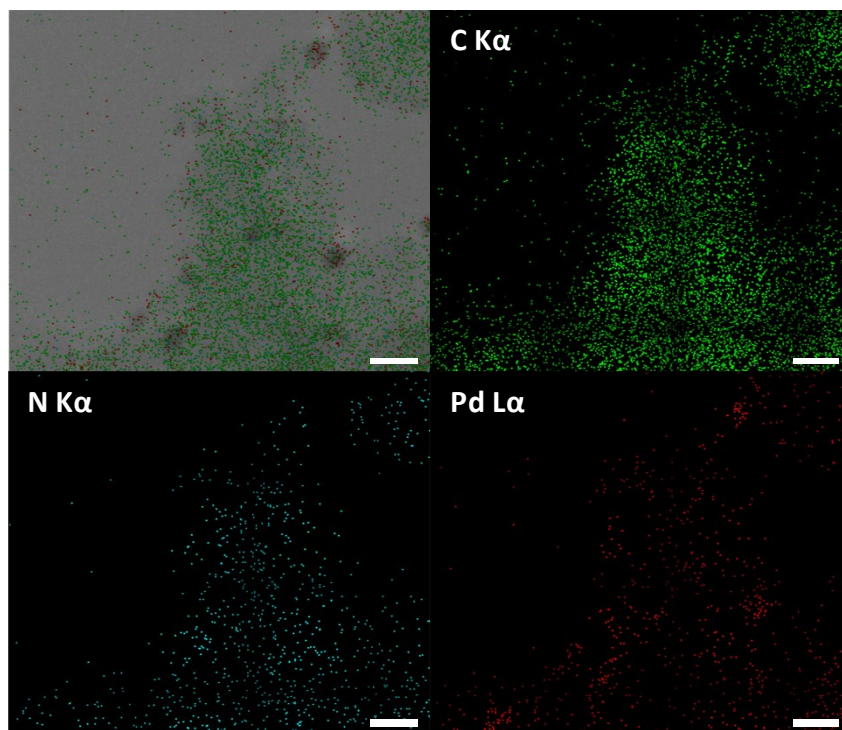

**Figure S9** Compositional EDS mapping of **Imine-POP@Pd** using scanning transmission electron microscopy. Scale bar 10 nm.

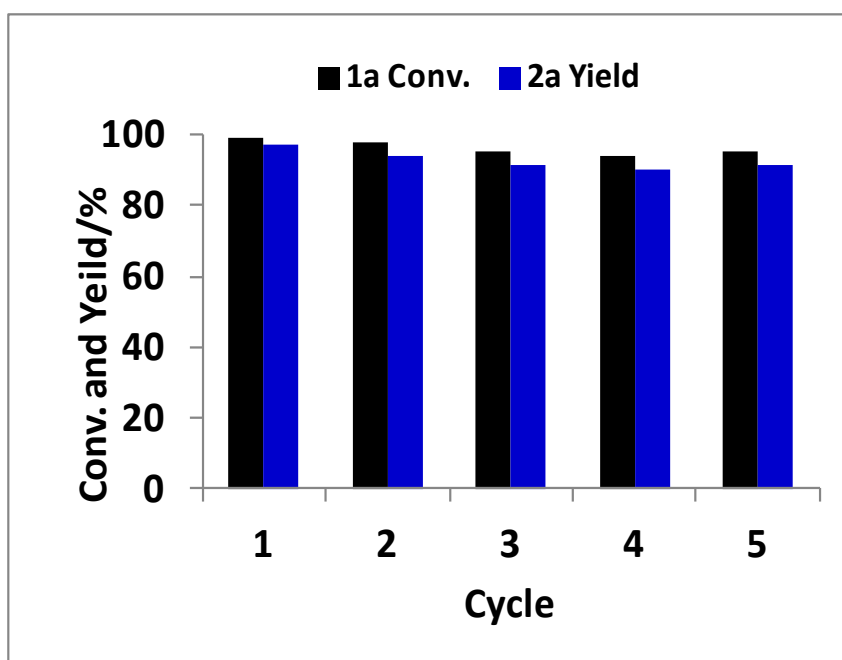

**Figure S10** Recyclability test of **Imine-POP@Pd**. Reaction conditions: morpholine, 1 mmol; **Imine-POP@Pd**, 30 mg (Pd 2.3 mol%);  $K_3PO_4$ , 0.3 mmol;  $CO_2$ , 3 MPa;  $H_2$ , 3 MPa; DMI, 4 mL; 100 °C, 24 h. Conversion and yield were determined by GC using biphenyl as an internal standard.

**Table S1 Base and catalyst screening<sup>a</sup>**

| <div>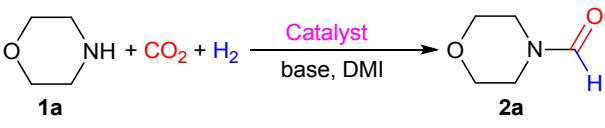<p>Reaction scheme: <b>1a</b> (4-oxa-1-azacyclohexane) + CO<sub>2</sub> + H<sub>2</sub> <math>\xrightarrow[\text{base, DMI}]{\text{Catalyst}}</math> <b>2a</b> (N-formyl-4-oxa-1-azacyclohexane).</p></div> |                                 |                                       |                      |
|----------------------------------------------------------------------------------------------------------------------------------------------------------------------------------------------------------------------------------------------------------------------------------------------------|---------------------------------|---------------------------------------|----------------------|
| Entry                                                                                                                                                                                                                                                                                              | Base                            | Catalyst                              | Yield/% <sup>b</sup> |
| 1                                                                                                                                                                                                                                                                                                  | K <sub>3</sub> PO <sub>4</sub>  | <b>Imine-POP@Pd</b>                   | 97                   |
| 2                                                                                                                                                                                                                                                                                                  | t-BuOK                          | <b>Imine-POP@Pd</b>                   | 59                   |
| 3                                                                                                                                                                                                                                                                                                  | KOH                             | <b>Imine-POP@Pd</b>                   | 91                   |
| 4                                                                                                                                                                                                                                                                                                  | Cs <sub>2</sub> CO <sub>3</sub> | <b>Imine-POP@Pd</b>                   | 36                   |
| 5                                                                                                                                                                                                                                                                                                  | DBU                             | <b>Imine-POP@Pd</b>                   | 23                   |
| 6 <sup>c</sup>                                                                                                                                                                                                                                                                                     | K <sub>3</sub> PO <sub>4</sub>  | <b>Al<sub>2</sub>O<sub>3</sub>@Pd</b> | 12                   |
| 7 <sup>c</sup>                                                                                                                                                                                                                                                                                     | K <sub>3</sub> PO <sub>4</sub>  | <b>TiO<sub>2</sub>@Pd</b>             | 87                   |
| 8 <sup>c</sup>                                                                                                                                                                                                                                                                                     | K <sub>3</sub> PO <sub>4</sub>  | <b>C@Pd</b>                           | 43                   |
| 9 <sup>d</sup>                                                                                                                                                                                                                                                                                     | K <sub>3</sub> PO <sub>4</sub>  | <b>Imine-POP@Pd</b>                   | 78                   |
| 10 <sup>e</sup>                                                                                                                                                                                                                                                                                    | K <sub>3</sub> PO <sub>4</sub>  | <b>Imine-POP@Pd</b>                   | 32                   |
| 11 <sup>e</sup>                                                                                                                                                                                                                                                                                    | K <sub>3</sub> PO <sub>4</sub>  | <b>Imine-POP@Pd</b>                   | 69                   |

<sup>a</sup> Reaction condition: **1a**, 1 mmol; **Imine-POP@Pd**, 30 mg (Pd was 2.3 mol% based on **1a**); K<sub>3</sub>PO<sub>4</sub>, 0.3 mmol or other base 1 mmol; CO<sub>2</sub> 3 MPa, H<sub>2</sub> 3 MPa; DMI, 4 mL; 100 °C, 24 h. <sup>b</sup> Determined by GC using biphenyl as the internal standard. <sup>c</sup> **Support@Pd** (Pd was 2.3 mol% based on **1a**). <sup>d</sup> The Pd content was 2.7 wt%, and the Pd loading was 2.3 mol% based on **1a**. <sup>e</sup> The Pd loading was 0.77 mol% (entry 10) and 1.53 mol% (entry 11).

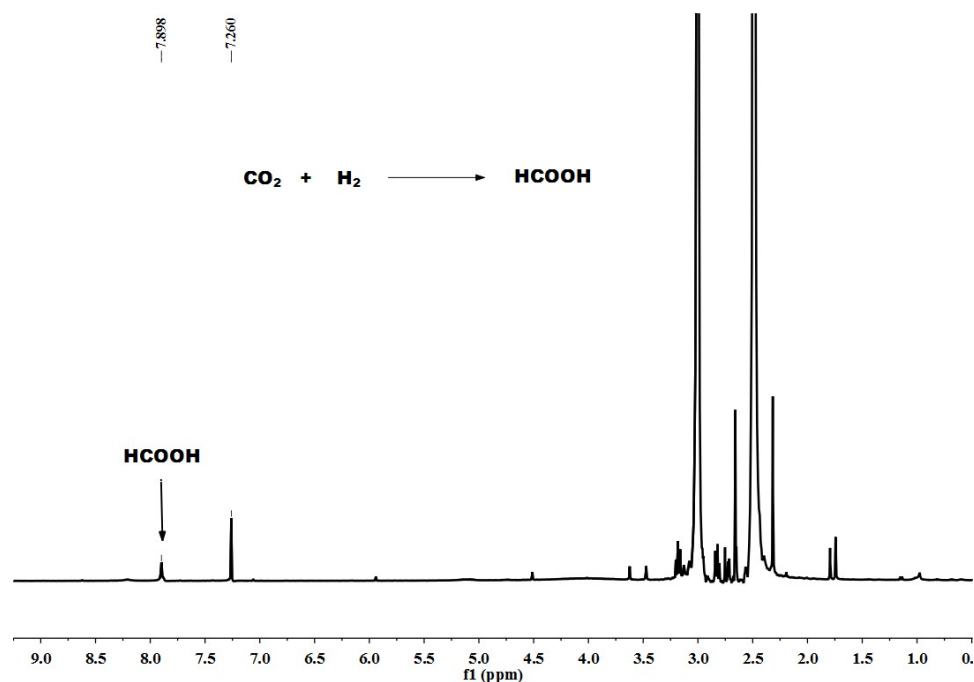

**Figure S11** The NMR spectrum of control experiment for mechanism study. Reaction conditions: **Imine-POP@Pd**, 30 mg (Pd 2.3 mol%);  $K_3PO_4$ , 0.3 mmol;  $CO_2$ , 3 MPa;  $H_2$ , 3 MPa; DMI, 4 mL; 100 °C, 24 h.

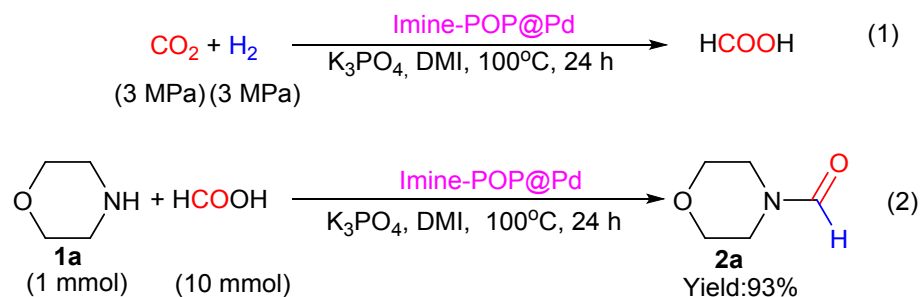

**Scheme S1** Control Experiment for Mechanism Study. (1) **Imine-POP@Pd** (Pd was 2.3 mol% based on **1a**);  $K_3PO_4$ , 0.3 mmol;  $CO_2$  3 MPa,  $H_2$  3 MPa; DMI, 4 mL; 100 °C, 24 h. HCOOH was determined by NMR. (2) **1a**, 1 mmol; HCOOH 10 mmol, **Imine-POP@Pd** (Pd was 2.3 mol% based on **1a**);  $K_3PO_4$ , 0.3 mmol; DMI, 4 mL; 100 °C, 24 h. The yield of **2a** was determined by GC using biphenyl as the internal standard.

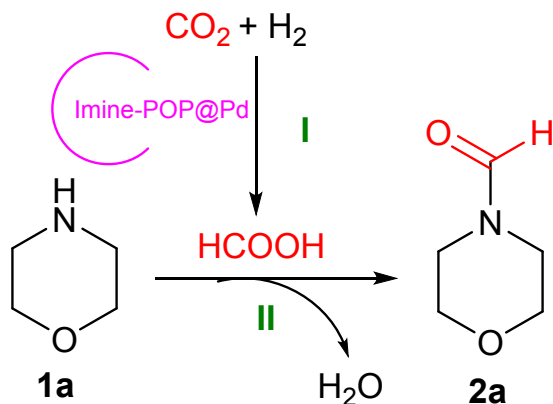

**Scheme S2** Possible reaction mechanism for the **Imine-POP@Pd** catalyzed N-formylation reaction of amines with  $\text{CO}_2/\text{H}_2$ .

#### 4. Determination of the product yields

The structure of **2a** was characterized by comparing the retention time with the authentic compound and GC-MS. The yield was determined by GC using biphenyl as the internal standard and calculated through the calibration curves as shown below. For **2b-2n**, NMR yields were given. The  $^1\text{H}$  NMR ( $\text{CDCl}_3$ , 400 MHz) spectra of the reaction mixture and MS spectra of the product were shown below.

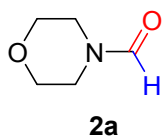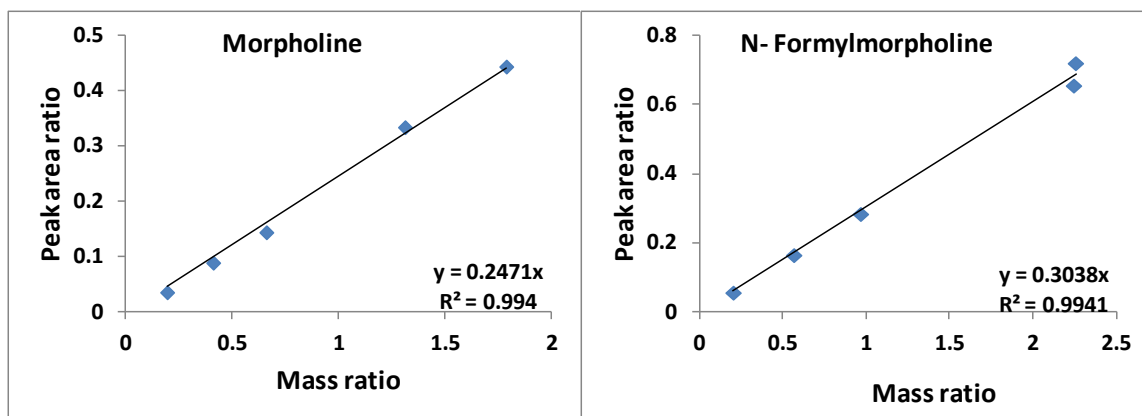

**Figure S12** Working Curves to determine concentrations of **morpholine** and **N-formylmorpholine**

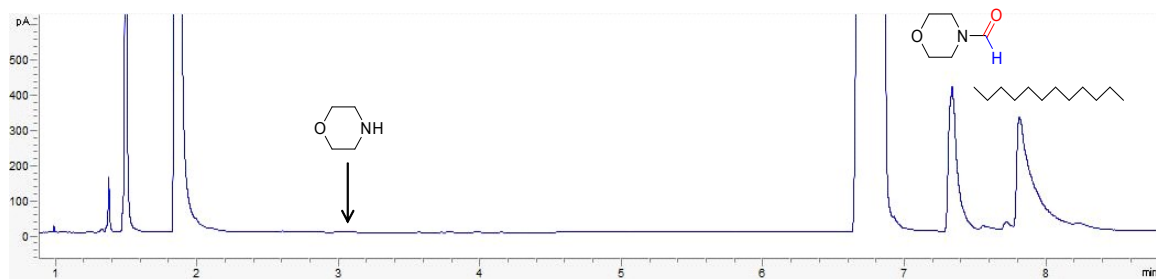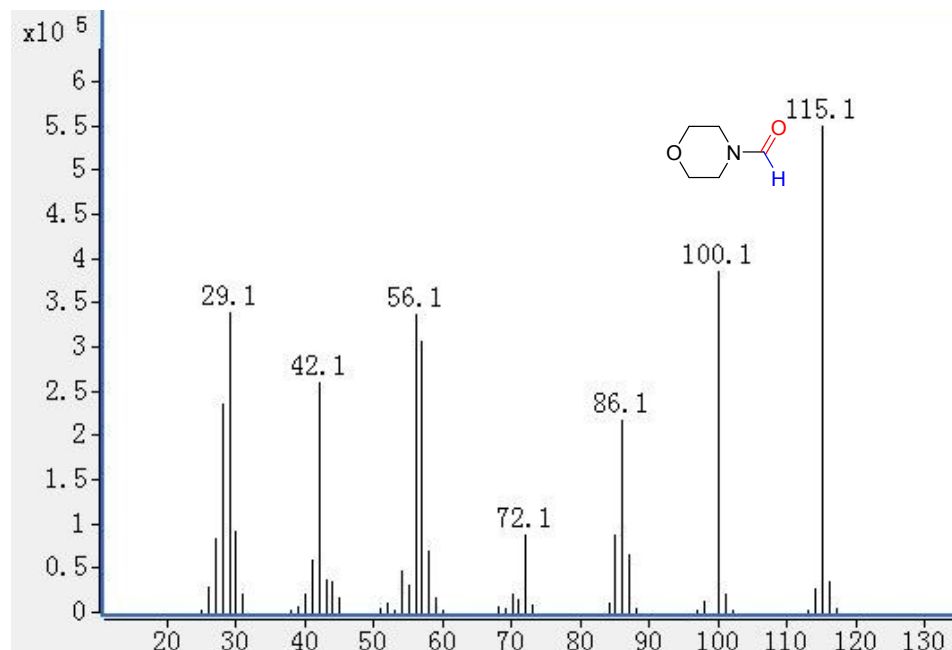

**Figure S13** GC spectra of reaction solution of morpholine (**1a**) reacting with  $\text{CO}_2/\text{H}_2$  and MS spectrum of **2a**.

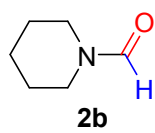

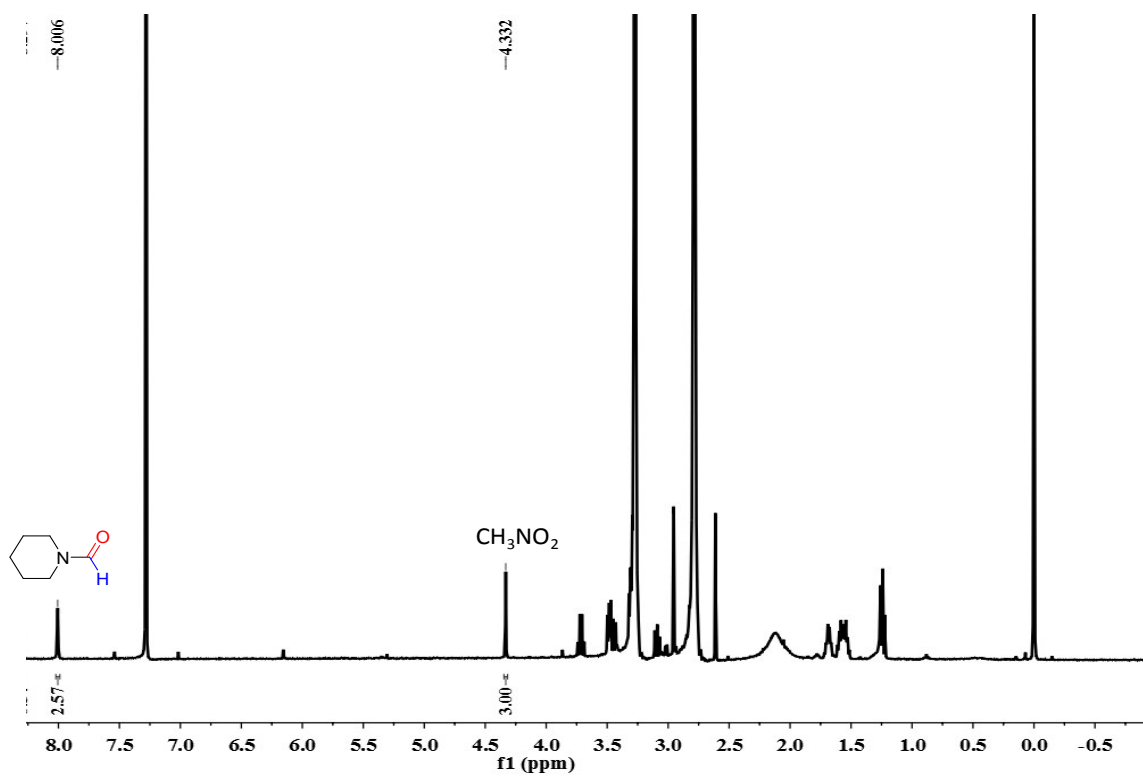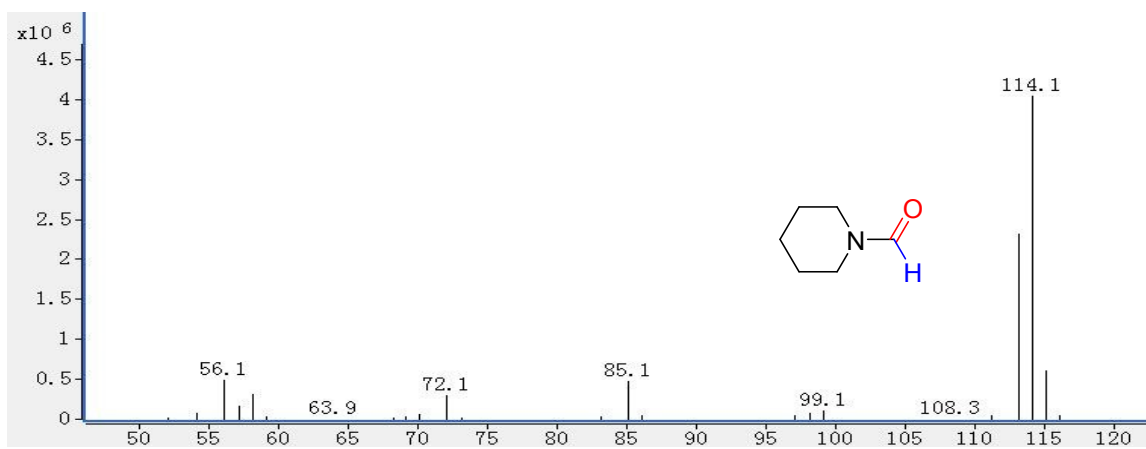

**Figure S14** NMR spectrum of reaction solution of **1b** reacting with CO<sub>2</sub>/H<sub>2</sub> (**1b**: 0.0747 g; CH<sub>3</sub>NO<sub>2</sub>: 0.0190 g) and MS spectrum of **2b**.

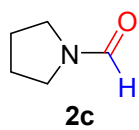

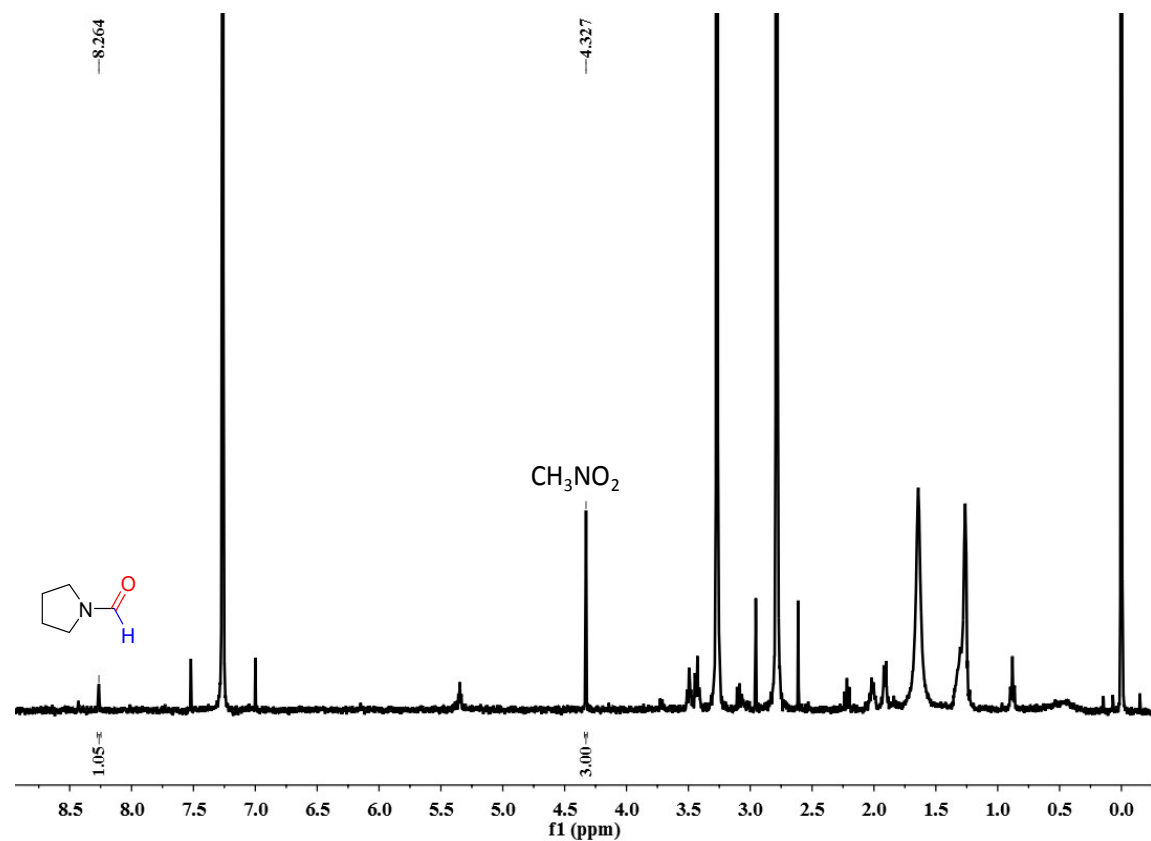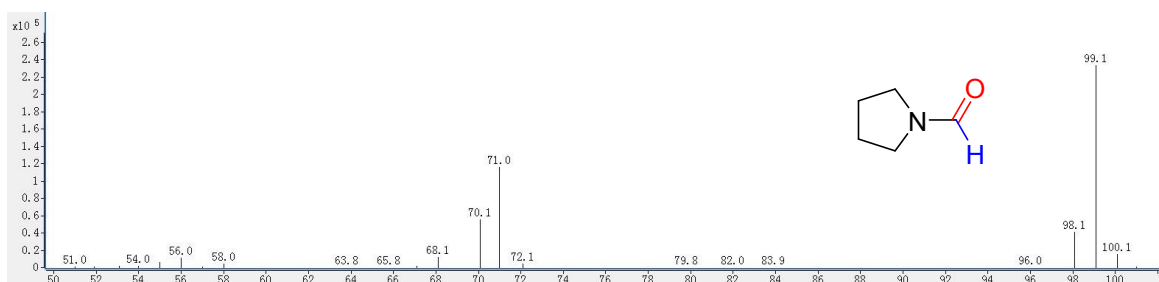

**Figure S15** NMR spectrum of reaction solution of **1c** reacting with CO<sub>2</sub>/H<sub>2</sub> (**1c**: 0.0773 g; CH<sub>3</sub>NO<sub>2</sub>: 0.0584 g) and MS spectrum of **2c**.

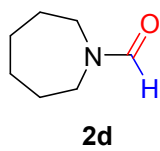

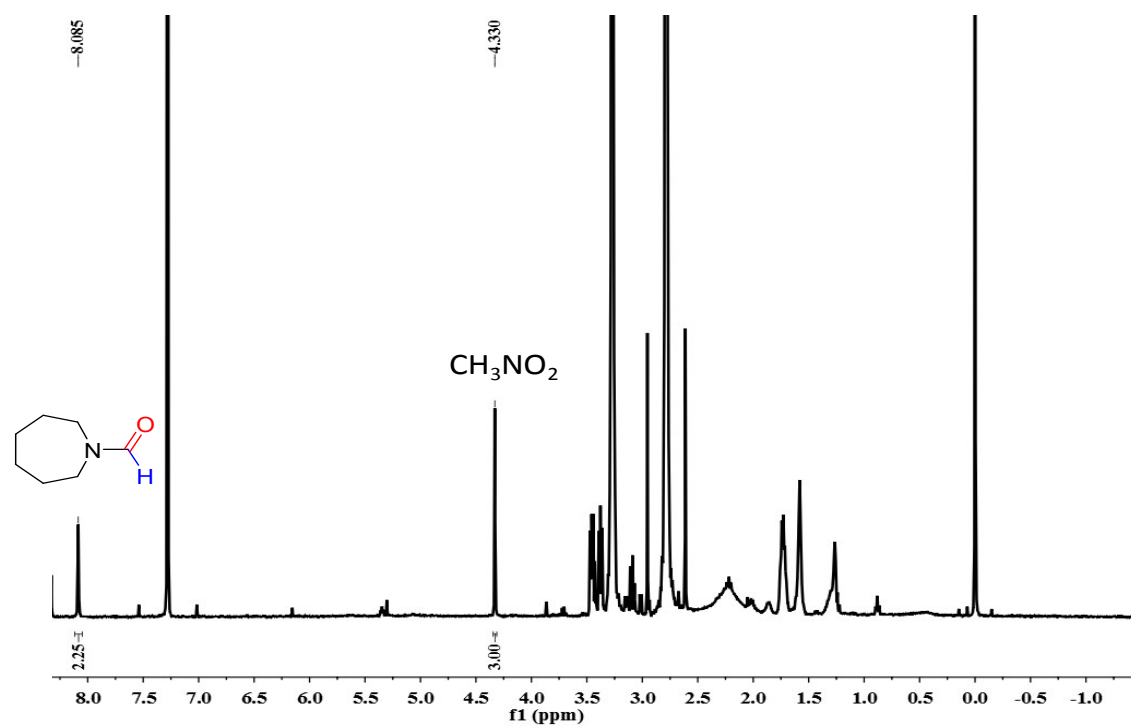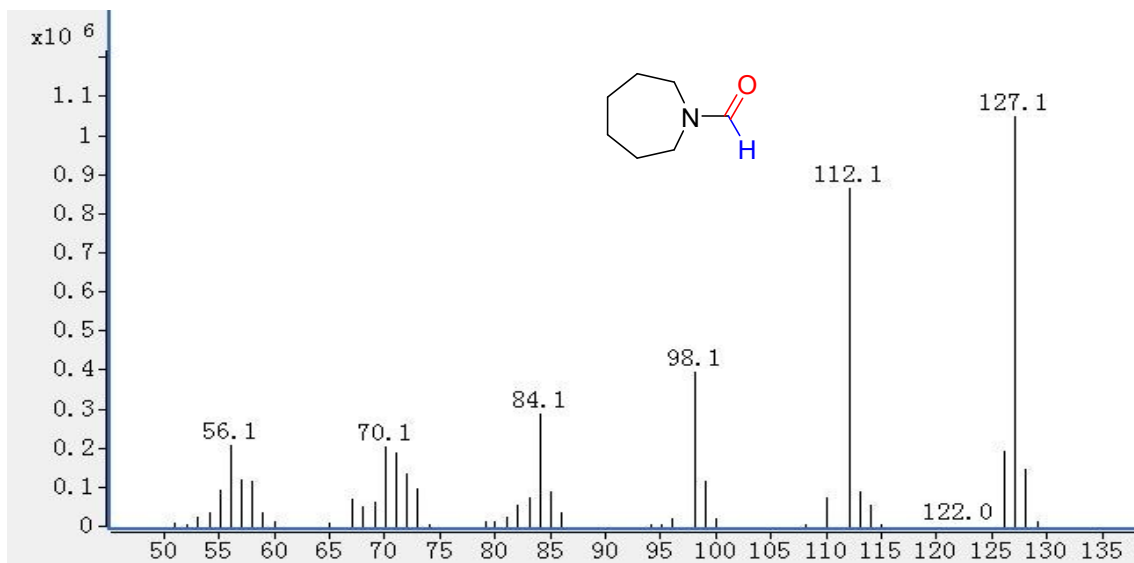

**Figure S16** NMR spectrum of reaction solution of **1d** reacting with CO<sub>2</sub>/H<sub>2</sub> (**1d**: 0.1073 g; CH<sub>3</sub>NO<sub>2</sub>: 0.0245 g) and MS spectrum of **2d**.

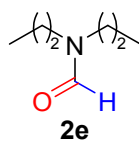

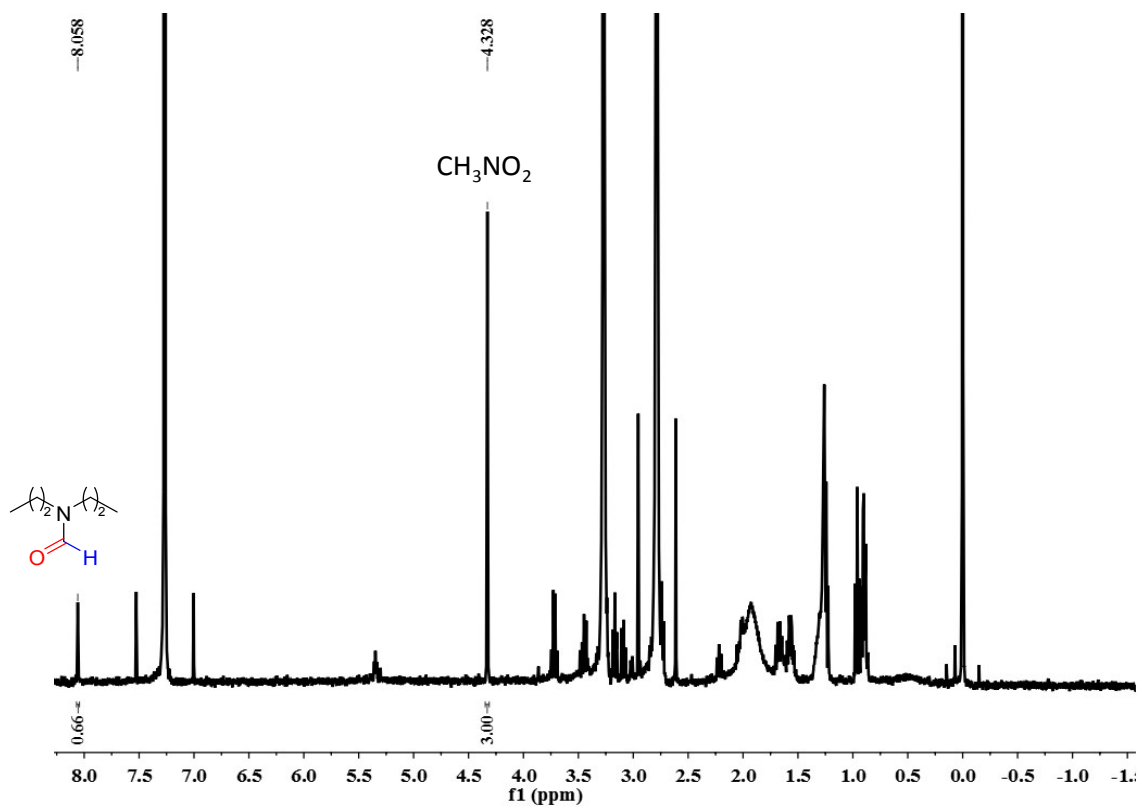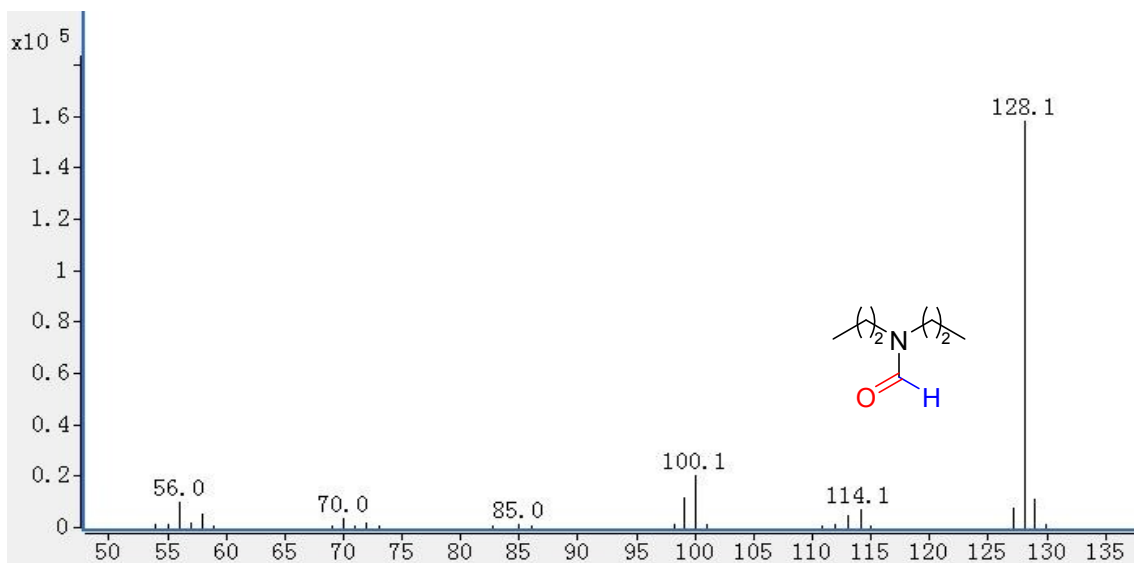

**Figure S17** NMR spectrum of reaction solution of **1e** reacting with CO<sub>2</sub>/H<sub>2</sub> (**1e**: 0.0884 g; CH<sub>3</sub>NO<sub>2</sub>: 0.0563 g) and MS spectrum of **2e**.

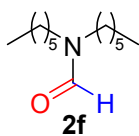

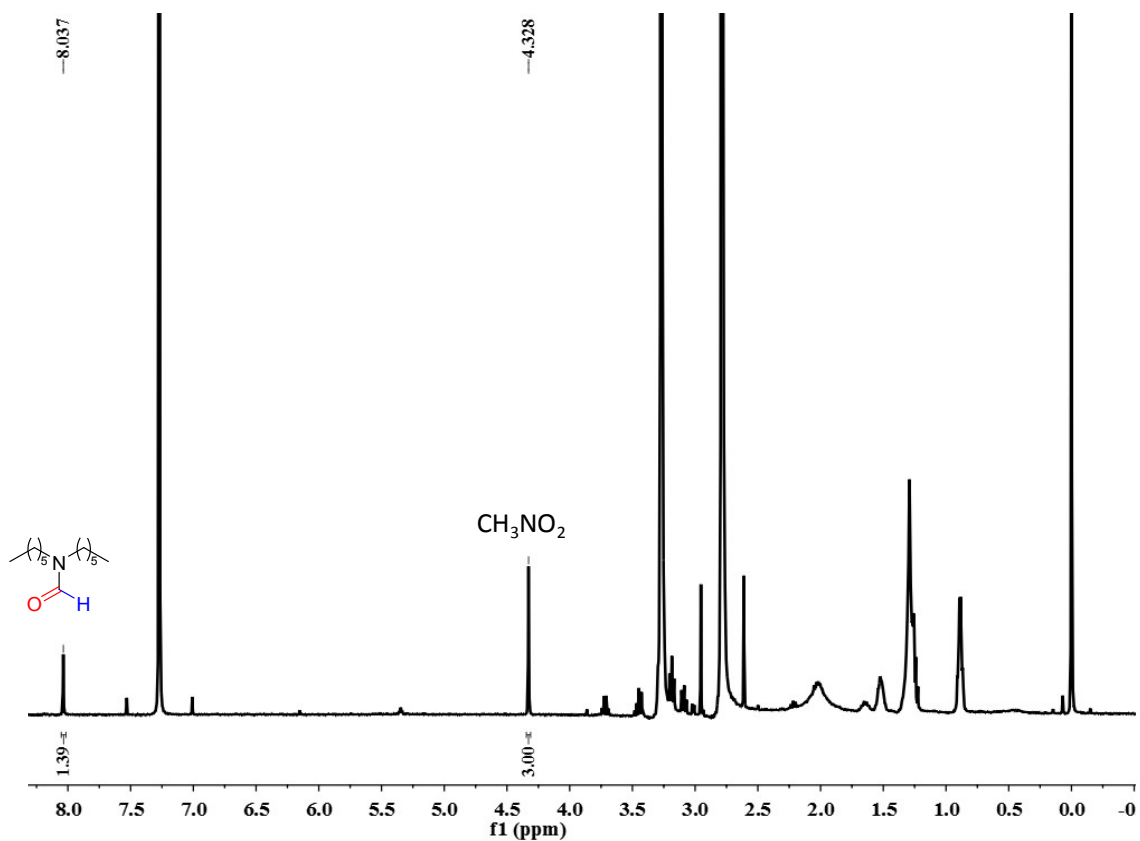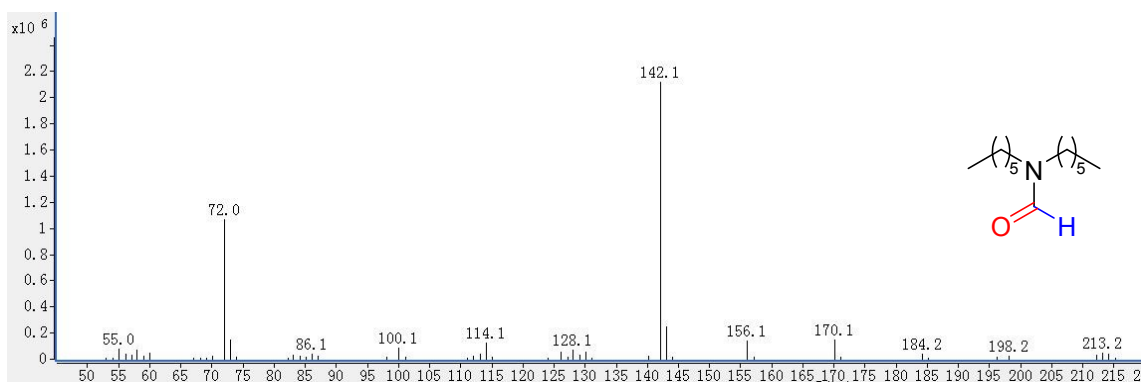

**Figure S18** NMR spectrum of reaction solution of **1f** reacting with  $\text{CO}_2/\text{H}_2$  (**1f**: 0.1814 g;  $\text{CH}_3\text{NO}_2$ : 0.0360 g) and MS spectrum of **2f**.

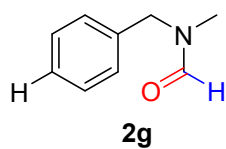

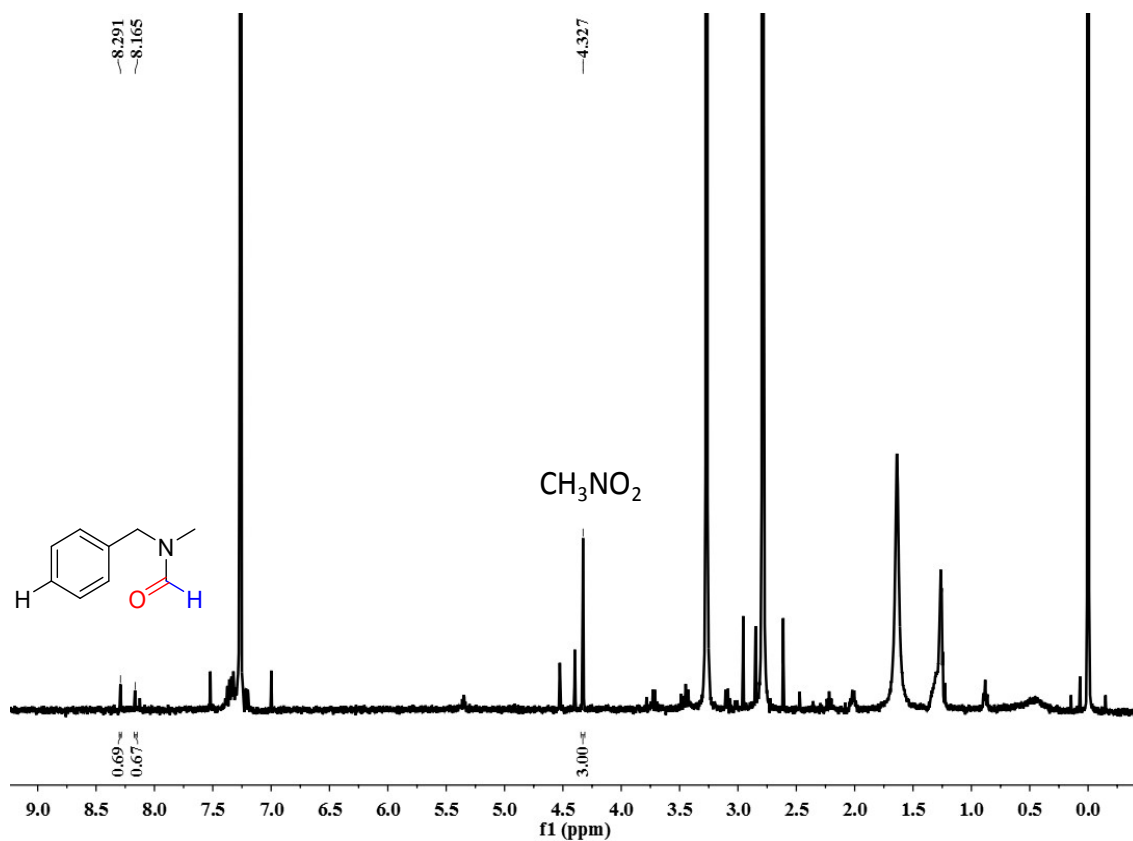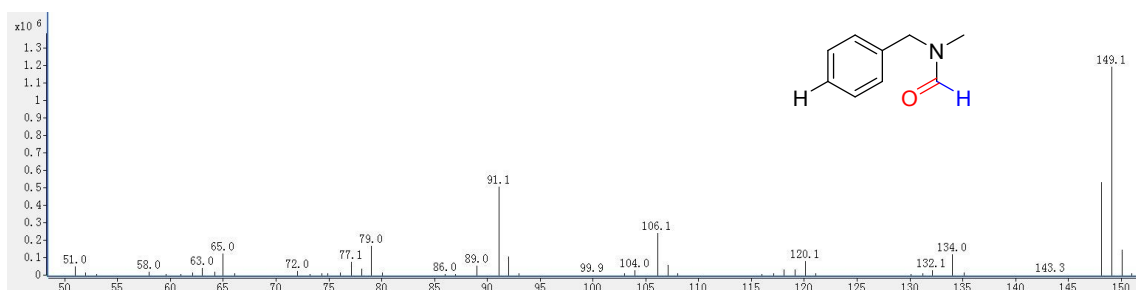

**Figure S19** NMR spectrum of reaction solution of **1g** reacting with CO<sub>2</sub>/H<sub>2</sub> (**1g**: 0.1626 g; CH<sub>3</sub>NO<sub>2</sub>: 0.0590 g ) and MS spectrum of **2g**.

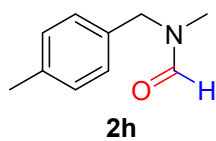

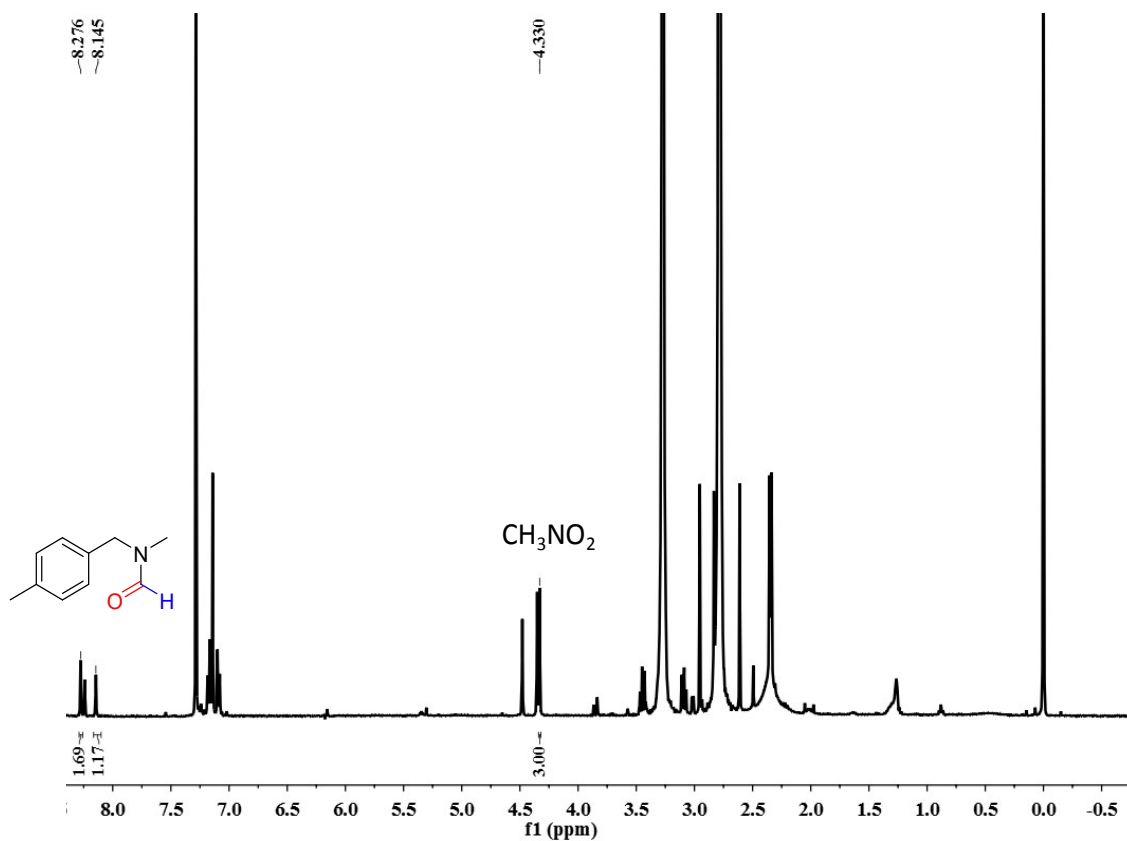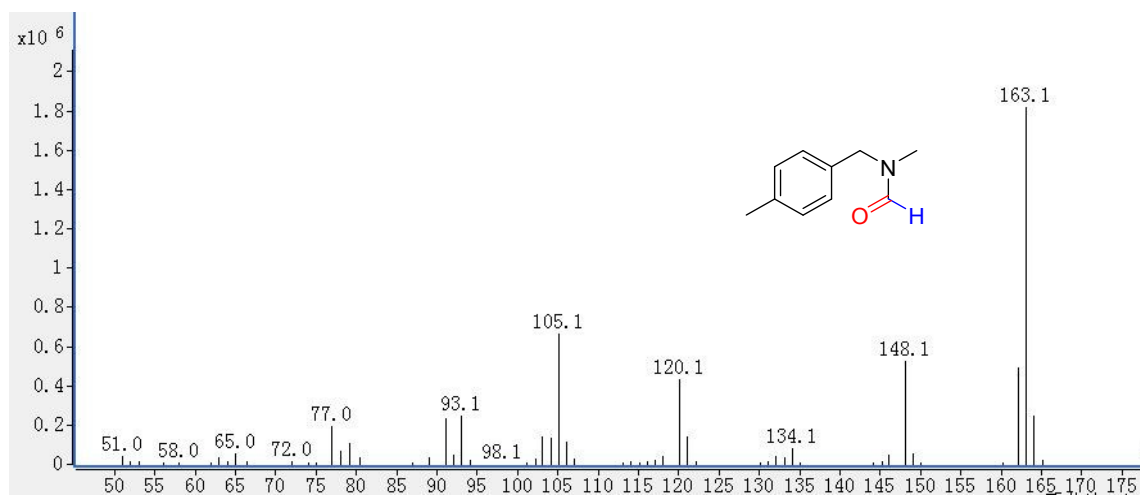

**Figure S20** NMR spectrum of reaction solution of **1h** reacting with CO<sub>2</sub>/H<sub>2</sub> (**1h**: 0.1407 g; CH<sub>3</sub>NO<sub>2</sub>: 0.0157 g) and MS spectrum of **2h**.

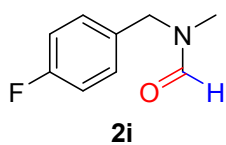

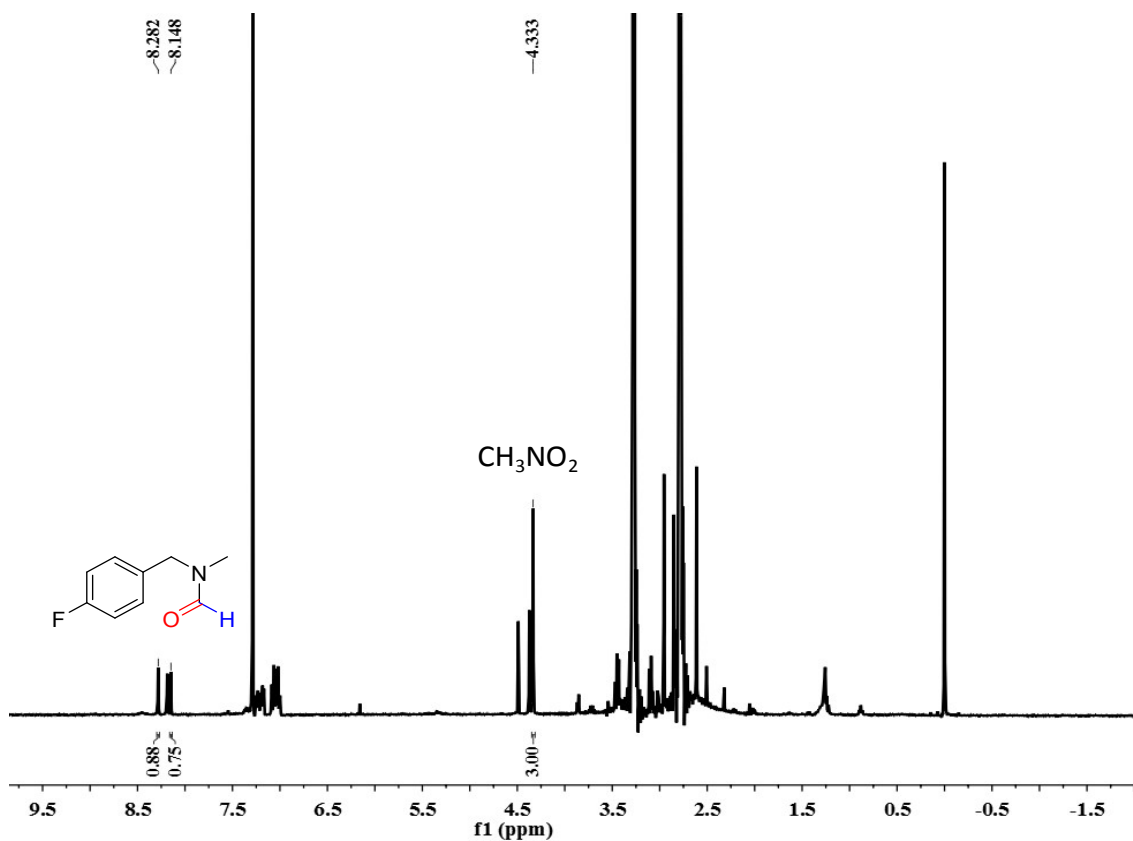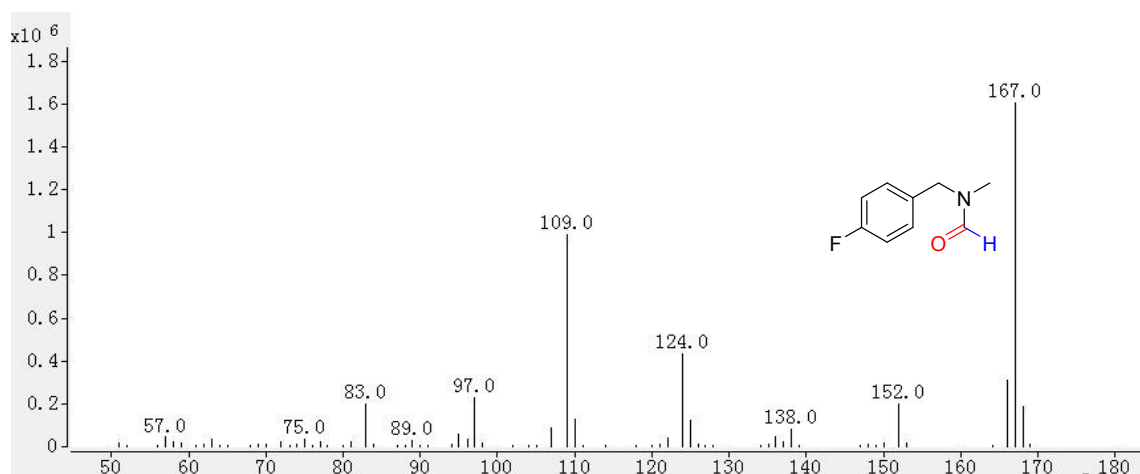

**Figure S21** NMR spectrum of reaction solution of **1i** reacting with  $\text{CO}_2/\text{H}_2$  (**1i**: 0.1328 g;  $\text{CH}_3\text{NO}_2$ : 0.0272 g) and MS spectrum of **2i**.

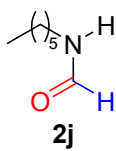

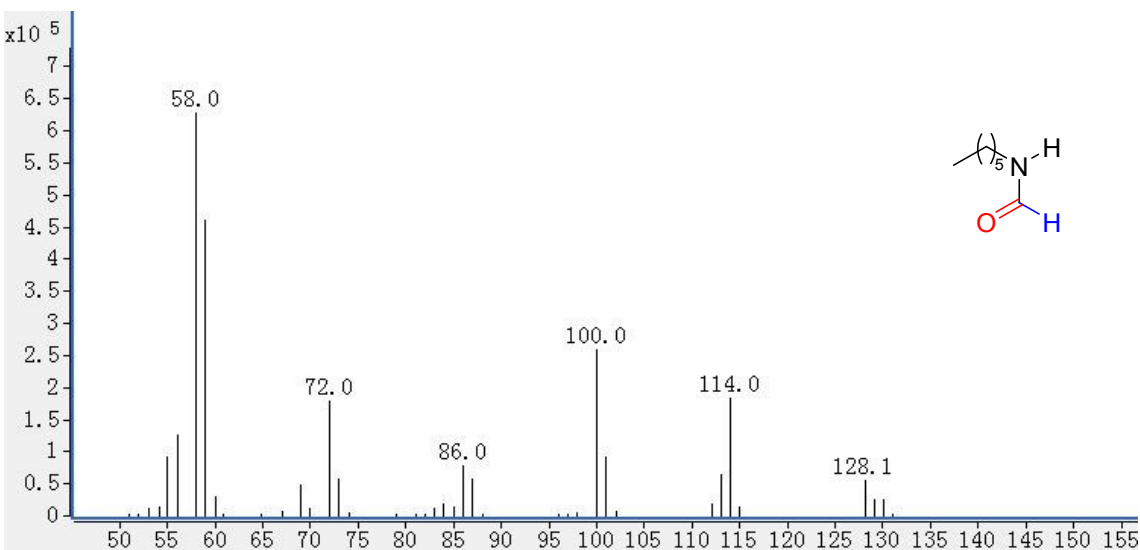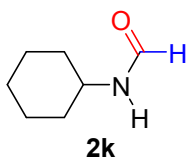

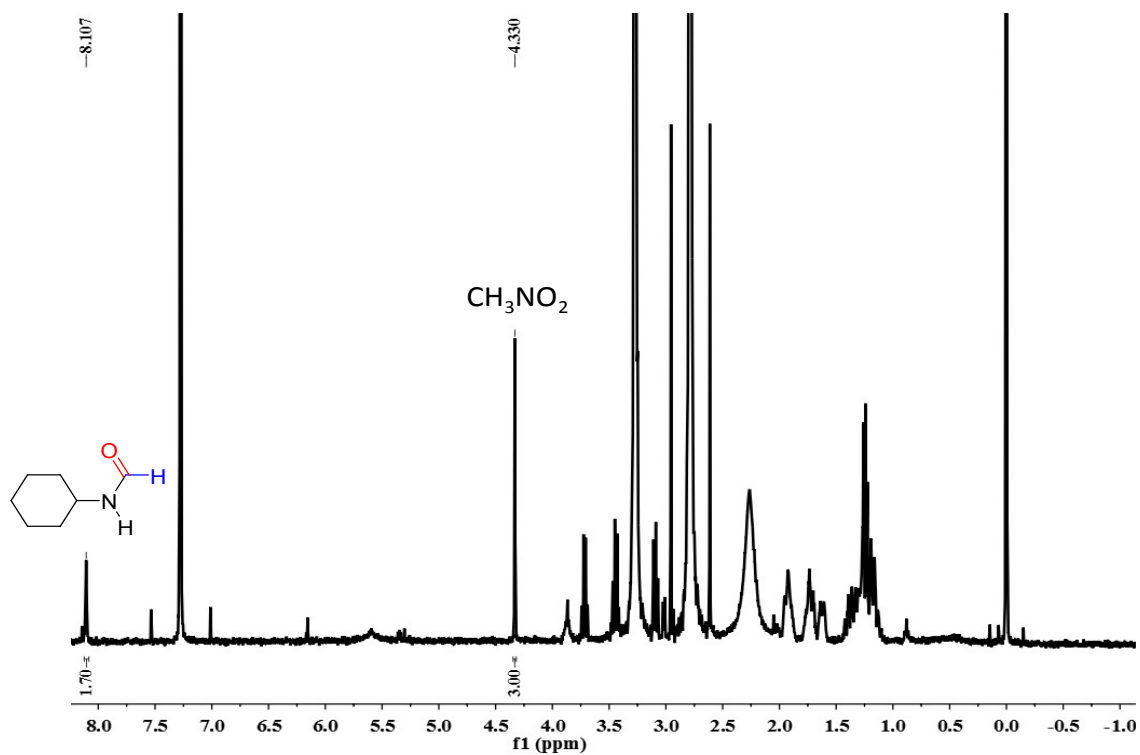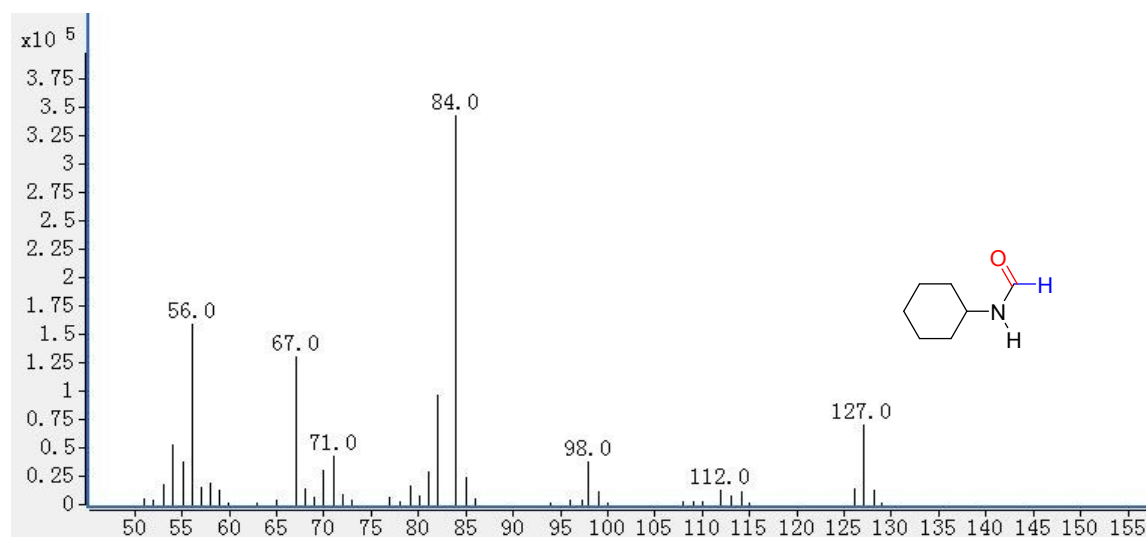

**Figure S23** NMR spectrum of reaction solution of **1k** reacting with CO<sub>2</sub>/H<sub>2</sub> (**1k**:0.0992 g; CH<sub>3</sub>NO<sub>2</sub>: 0.0278 g) and MS spectrum of **2k**.

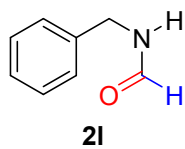

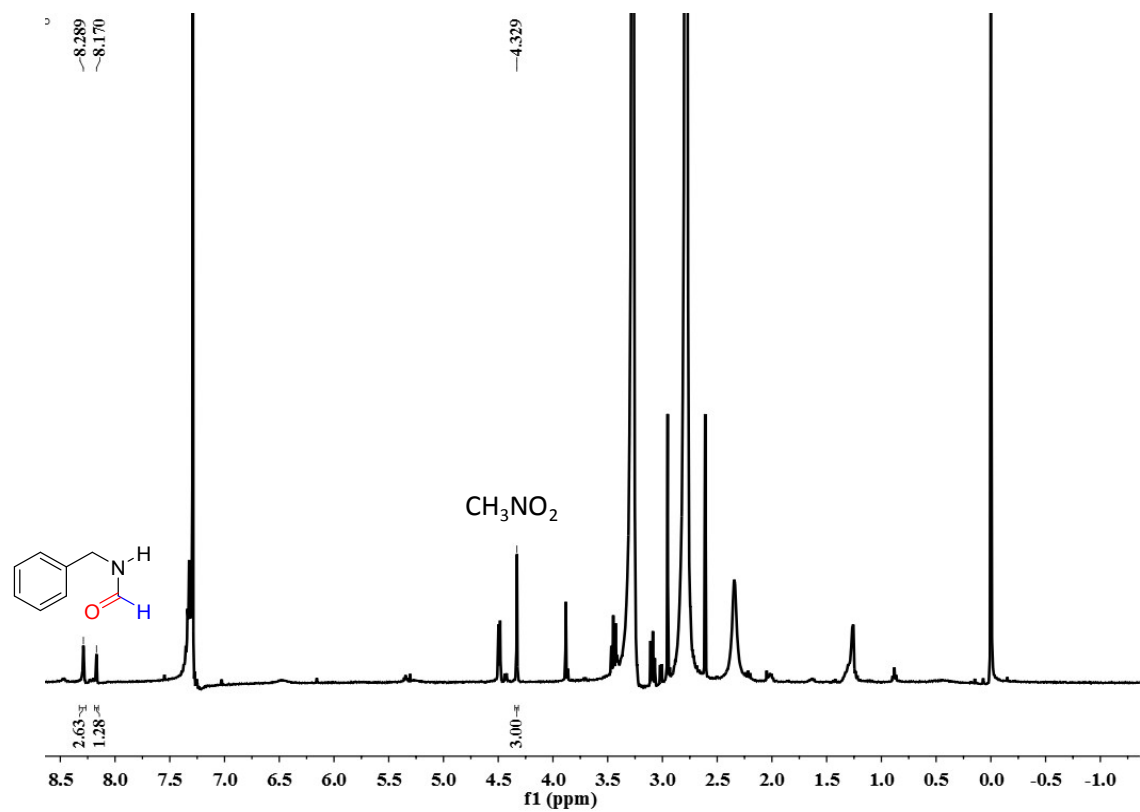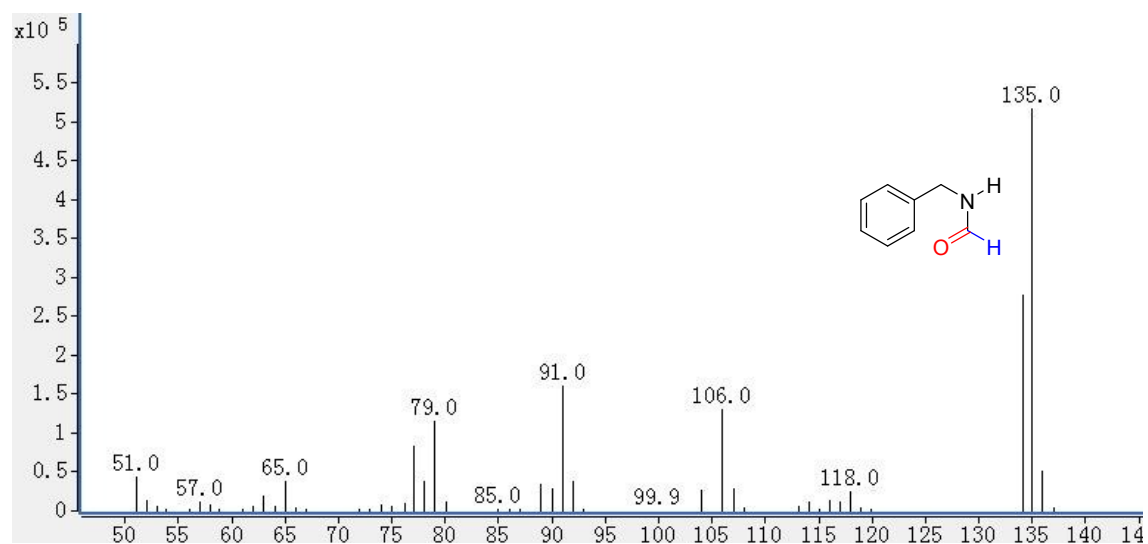

**Figure S24** NMR spectrum of reaction solution of **1l** reacting with CO<sub>2</sub>/H<sub>2</sub> (**1l**:0.1329 g; CH<sub>3</sub>NO<sub>2</sub>: 0.0176 g) and MS spectrum of **2l**.

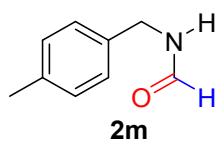

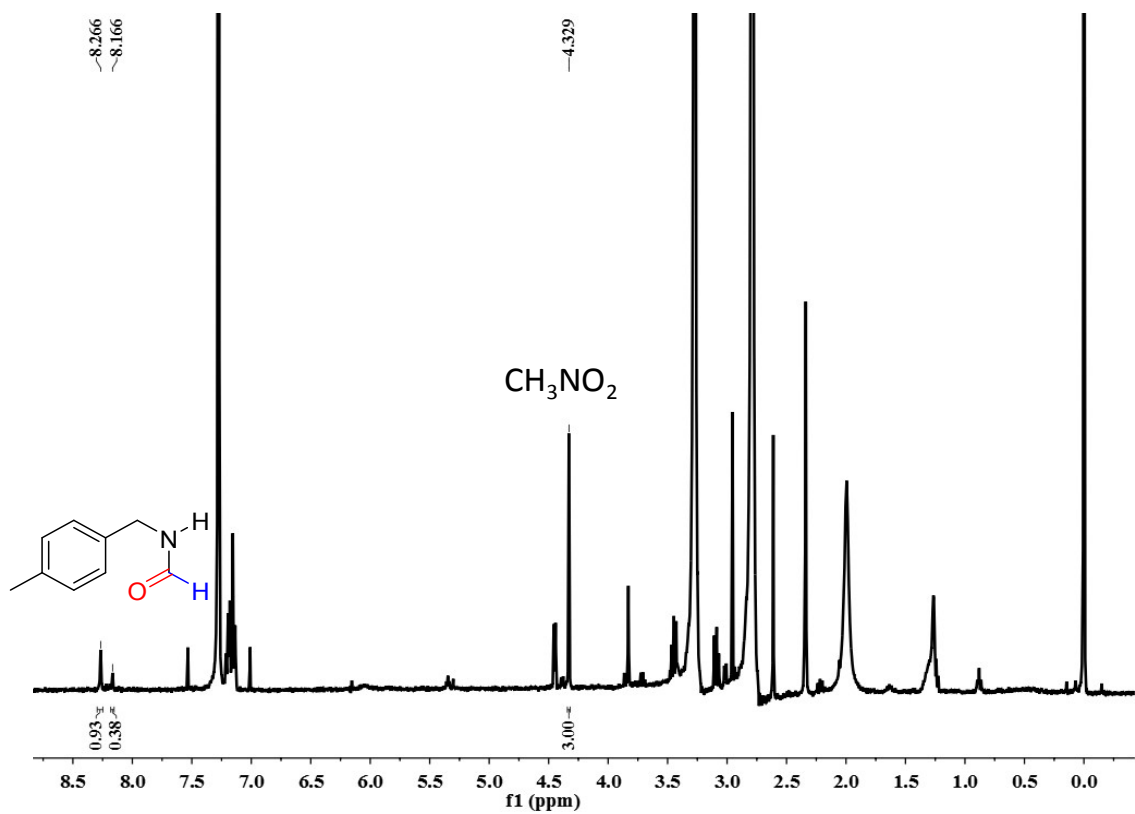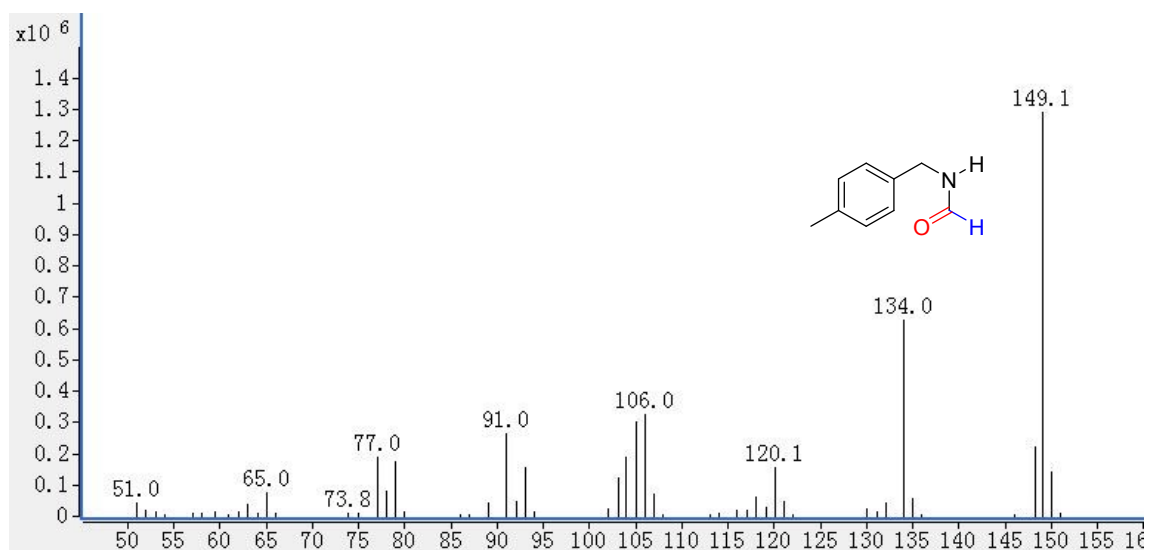

**Figure S25** NMR spectrum of reaction solution of **1m** reacting with  $\text{CO}_2/\text{H}_2$  (**1m**: 0.1168 g;  $\text{CH}_3\text{NO}_2$ : 0.0306 g) and MS spectrum of **2m**.

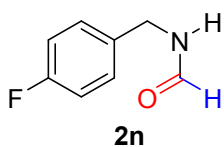

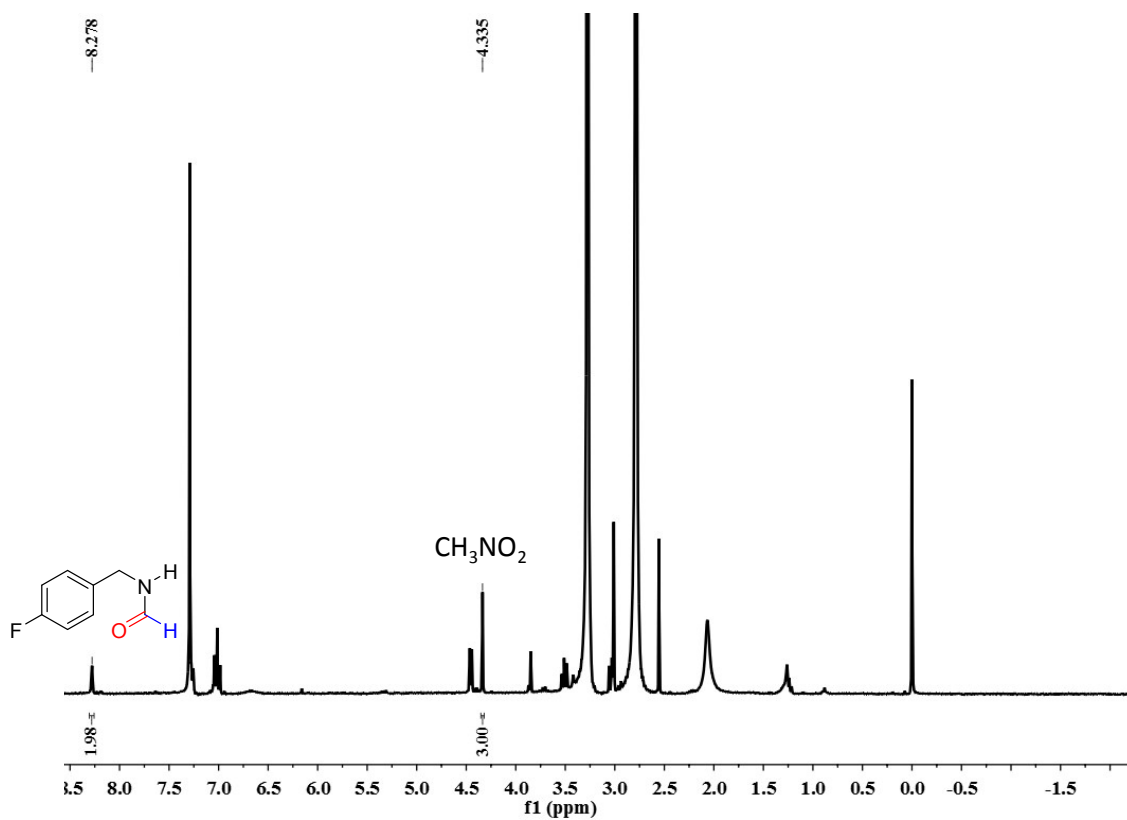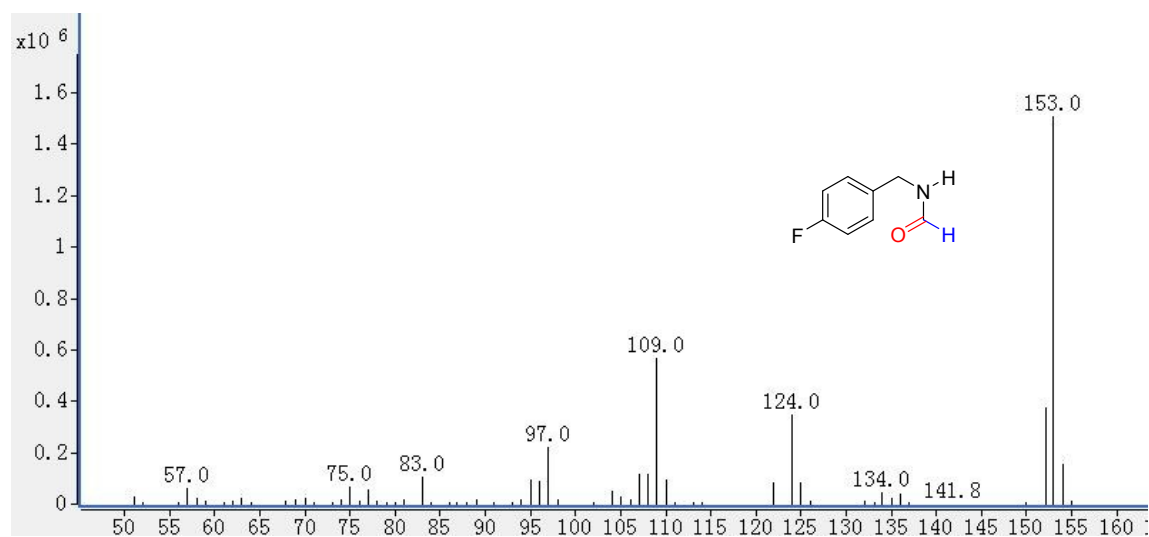

**Figure S26** NMR spectrum of reaction solution of **1n** reacting with CO<sub>2</sub>/H<sub>2</sub> (**1n**:0.1309 g; CH<sub>3</sub>NO<sub>2</sub>: 0.0153 g) and MS spectrum of **2n**.

## 5. $^1\text{H}$ and $^{13}\text{C}$ NMR data of the isolated products

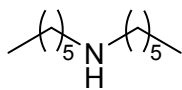

**2f**, N,N-diethylformamide; Purification by column chromatography on silica gel using n-hexane/ ethyl acetate (50:1) as eluent. Light yellow liquid;  $^1\text{H}$  NMR ( $\text{CDCl}_3$ , 400 MHz)  $\delta$  0.84-0.86 (m, 6H), 1.25 (s, 12H), 1.47-1.48 (m, 4H), 3.14 (t,  $^3J = 7.2$  Hz, 2H), 3.23 (t,  $^3J = 7.2$  Hz, 2H), 7.99 (s, 1H);  $^{13}\text{C}$  NMR ( $\text{CDCl}_3$ , 100.6 MHz)  $\delta$  13.83, 13.87, 22.41, 22.44, 26.04, 26.51, 27.17, 28.54, 31.27, 31.42, 42.02, 47.34, 162.54. M ( $\text{C}_{13}\text{H}_{27}\text{NO}$ ) = 213.2, EI-MS found 213.1 [M], 198.1 [M- $\text{CH}_3$ ], 184.1 [M-CHO].

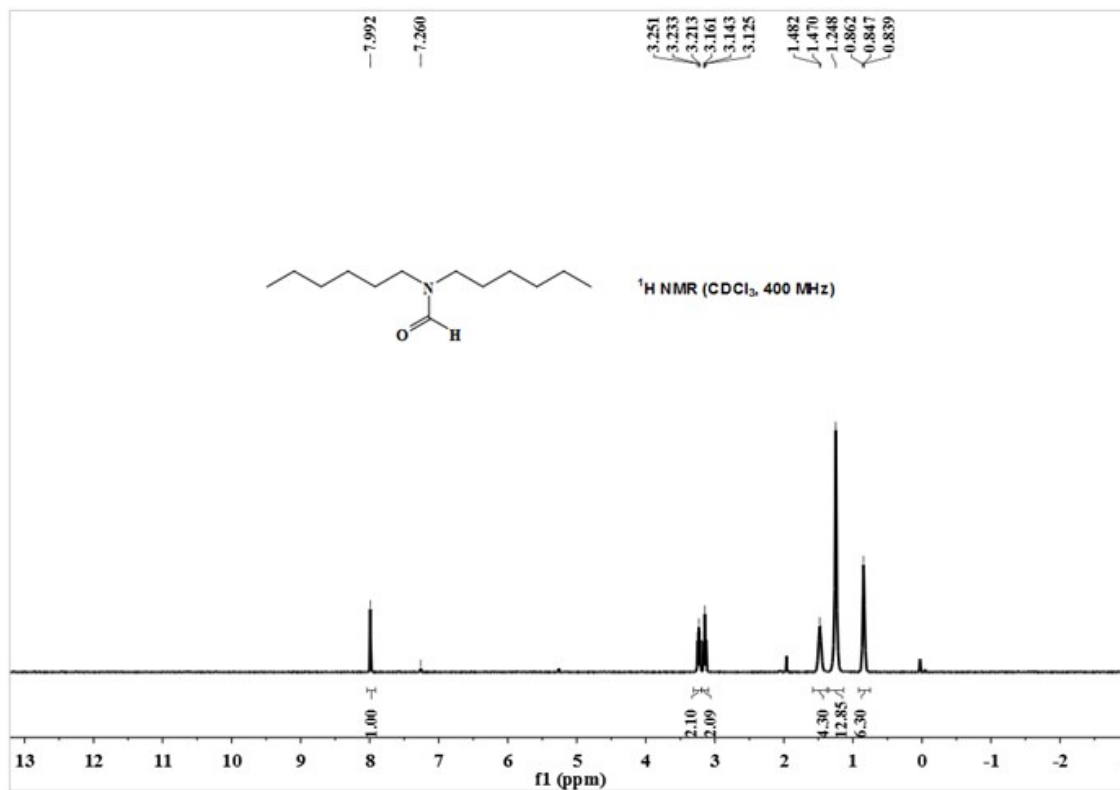

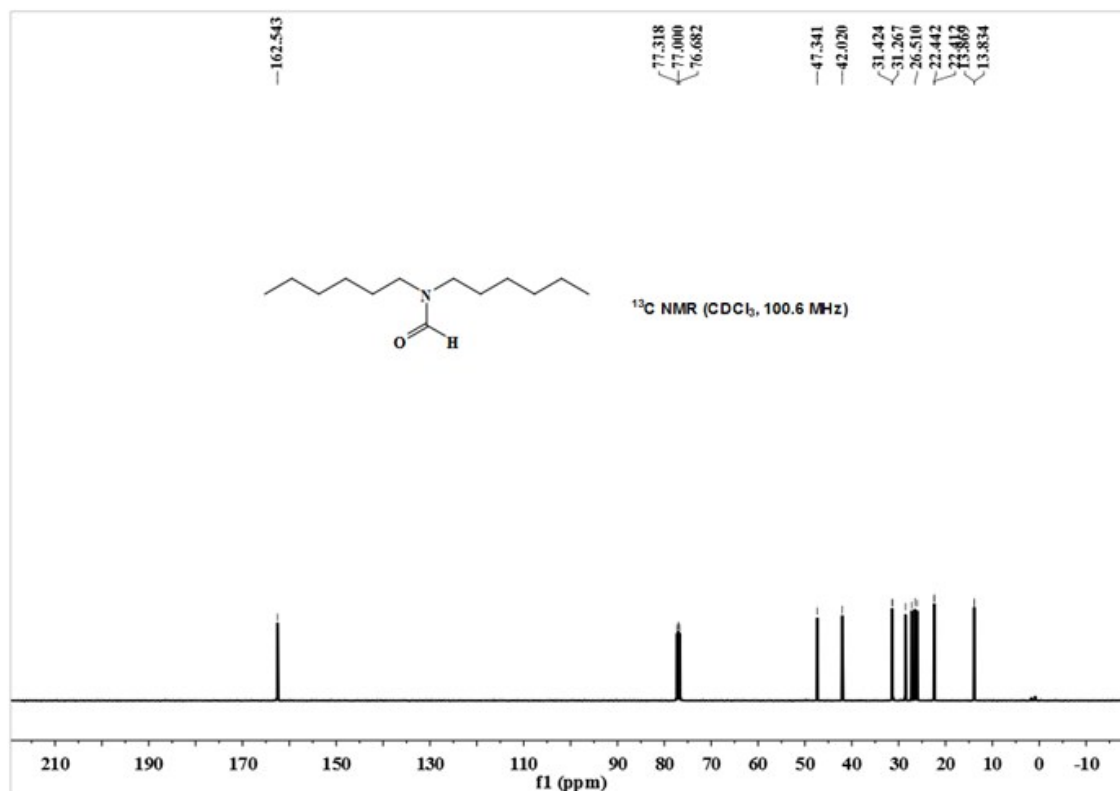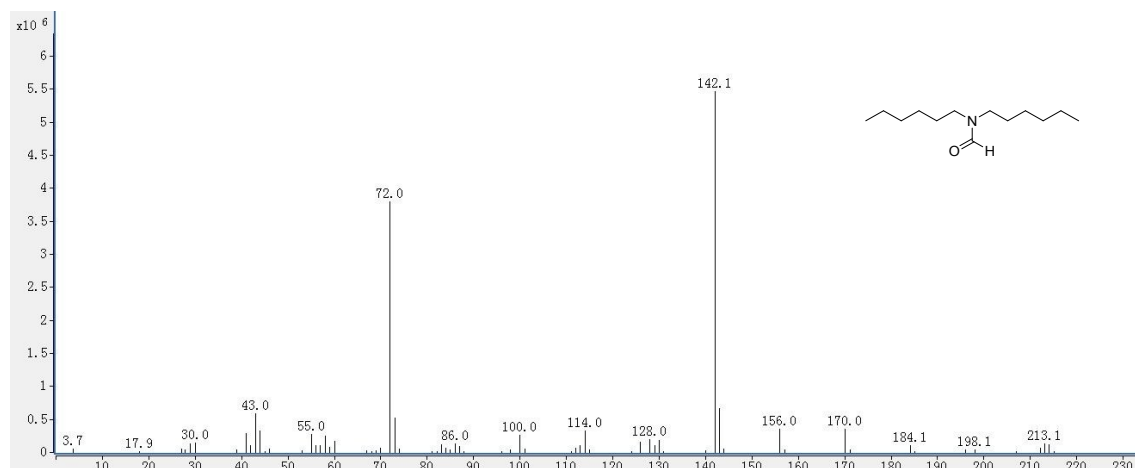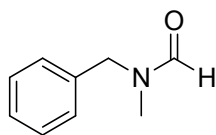

**2g**; N-methyl-N-benzylformamide; Purification by column chromatography on silica gel using n-hexane/ ethyl acetate (50:1) as eluent. Yellow liquid;  $^1\text{H}$  NMR (CDCl<sub>3</sub>, 400 MHz)  $\delta$  2.78, 2.84 (s, 3H), 4.39 (s, 1H), 4.52 (s, 1H), 7.19-7.37 (m, 5H), 8.16, 8.28 (s, 1H);  $^{13}\text{C}$  NMR (CDCl<sub>3</sub>, 100.6 MHz)  $\delta$  29.42, 33.98, 47.75, 53.45, 127.36, 127.60, 128.06, 128.22, 128.66, 128.87, 135.77, 136.03, 162.52, 162.69. M (C<sub>9</sub>H<sub>11</sub>NO) = 149.1, EI-MS found 149.1 [M], 134.0 [M-CH<sub>3</sub>], 120.1 [M-CHO].

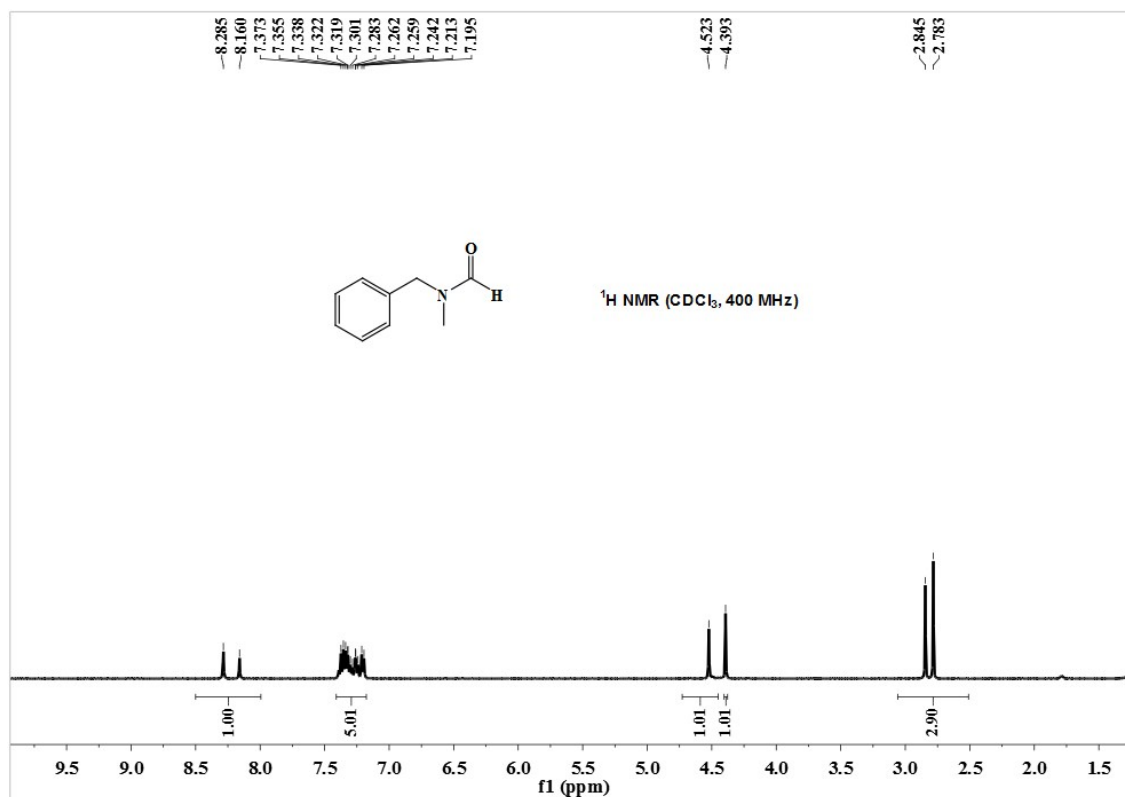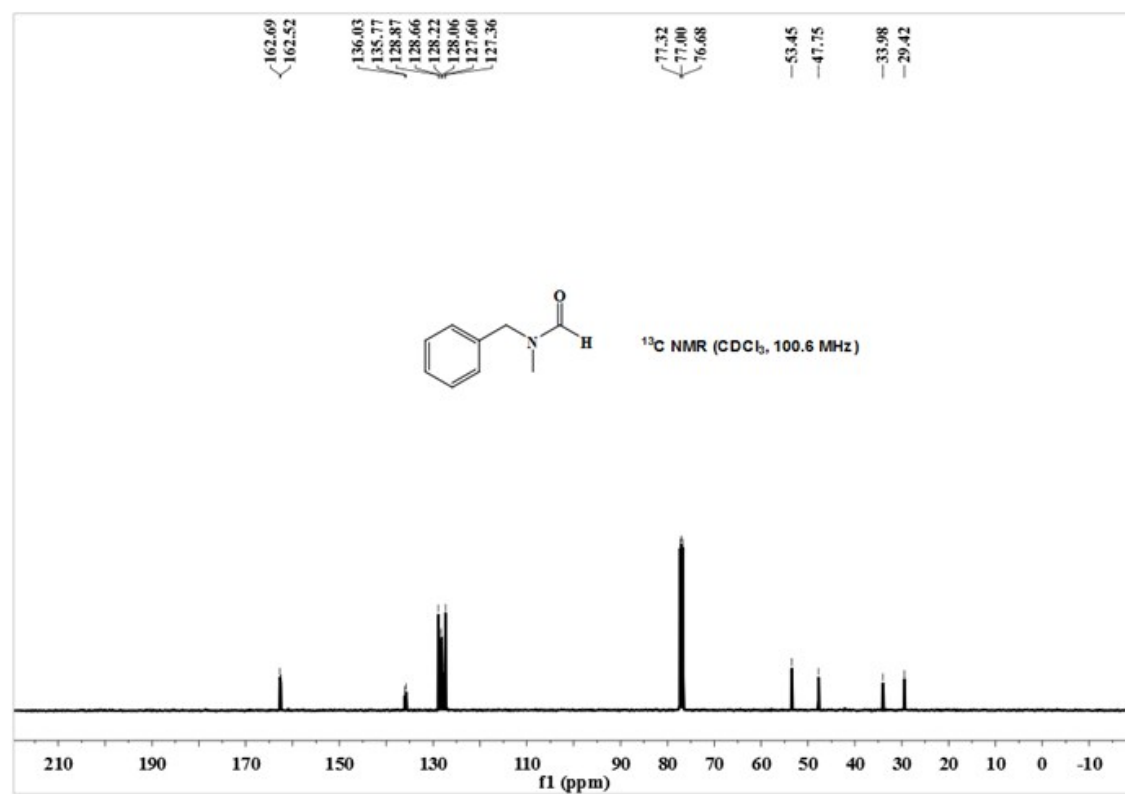

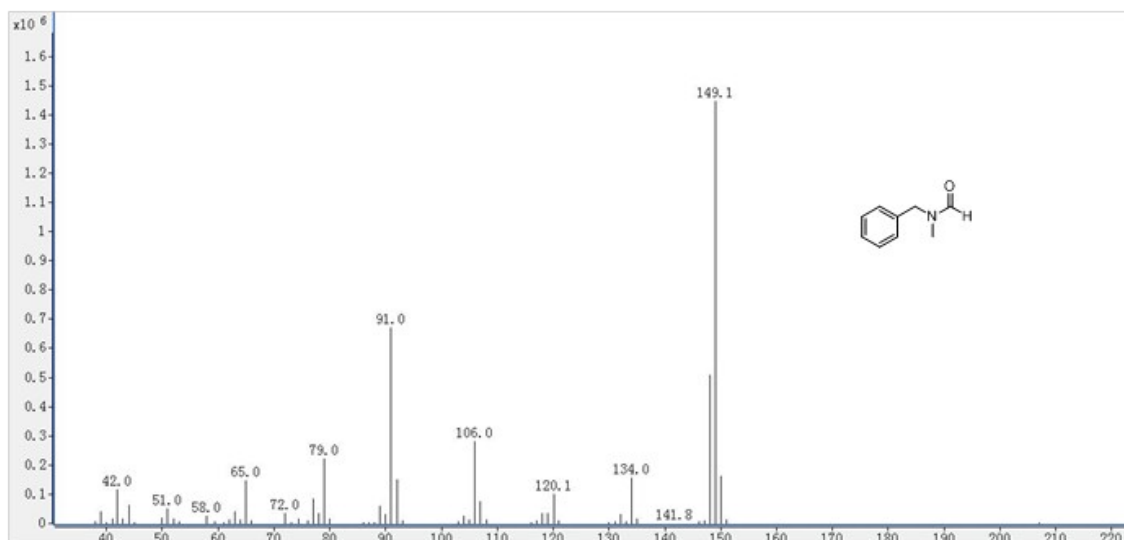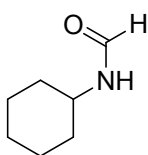

**2k**; N-cyclohexylformamide; Purification by column chromatography on silica gel using n-hexane/ ethyl acetate (20:1) as eluent. Colourless liquid;  $^1\text{H}$  NMR ( $\text{CDCl}_3$ , 400 MHz)  $\delta$  1.11-1.40 (m, 6H), 1.68-1.73 (m, 2H), 1.86-1.94 (m, 2H), 3.81-3.89 (m, 1H), 5.54 (s, 1H), 8.09 (s, 1H);  $^{13}\text{C}$  NMR ( $\text{CDCl}_3$ , 100.6 MHz)  $\delta$  24.70, 25.40, 33.02, 34.68, 47.05, 50.90, 160.23. M ( $\text{C}_7\text{H}_{13}\text{NO}$ ) = 127.1, EI-MS found 127.0 [M], 97.9 [M-CHO], 84.0 [M-NCHO].

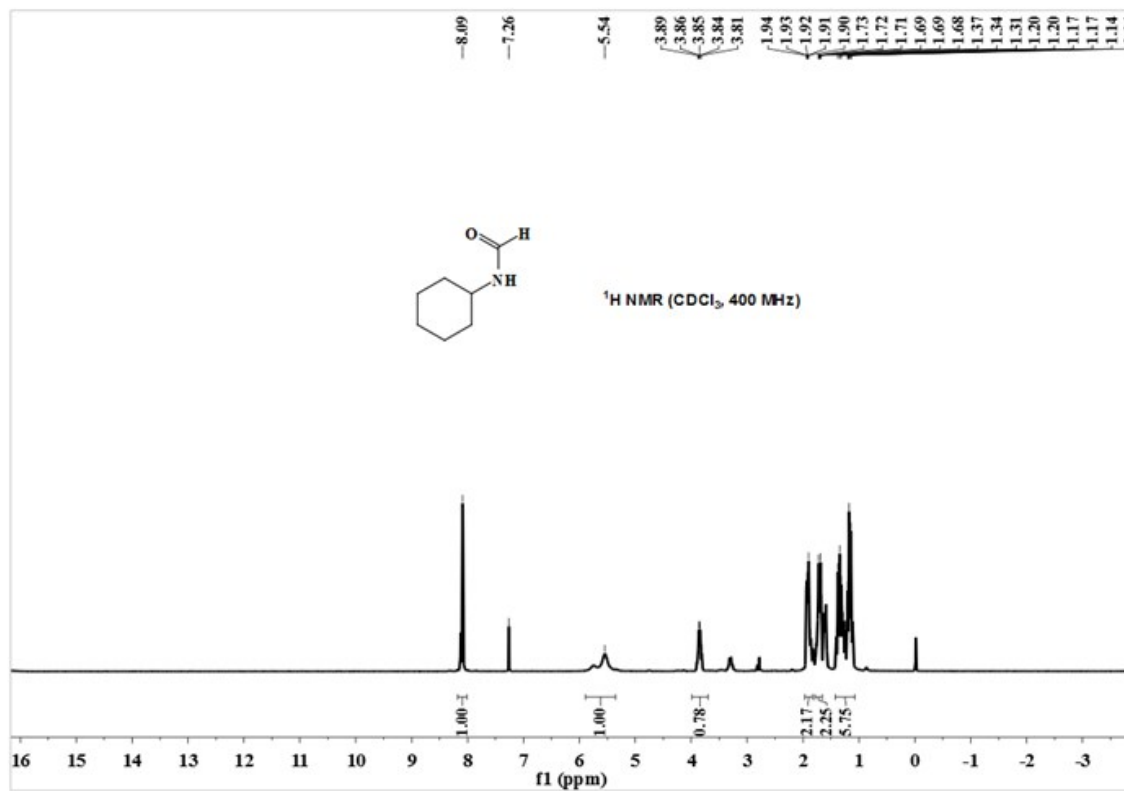

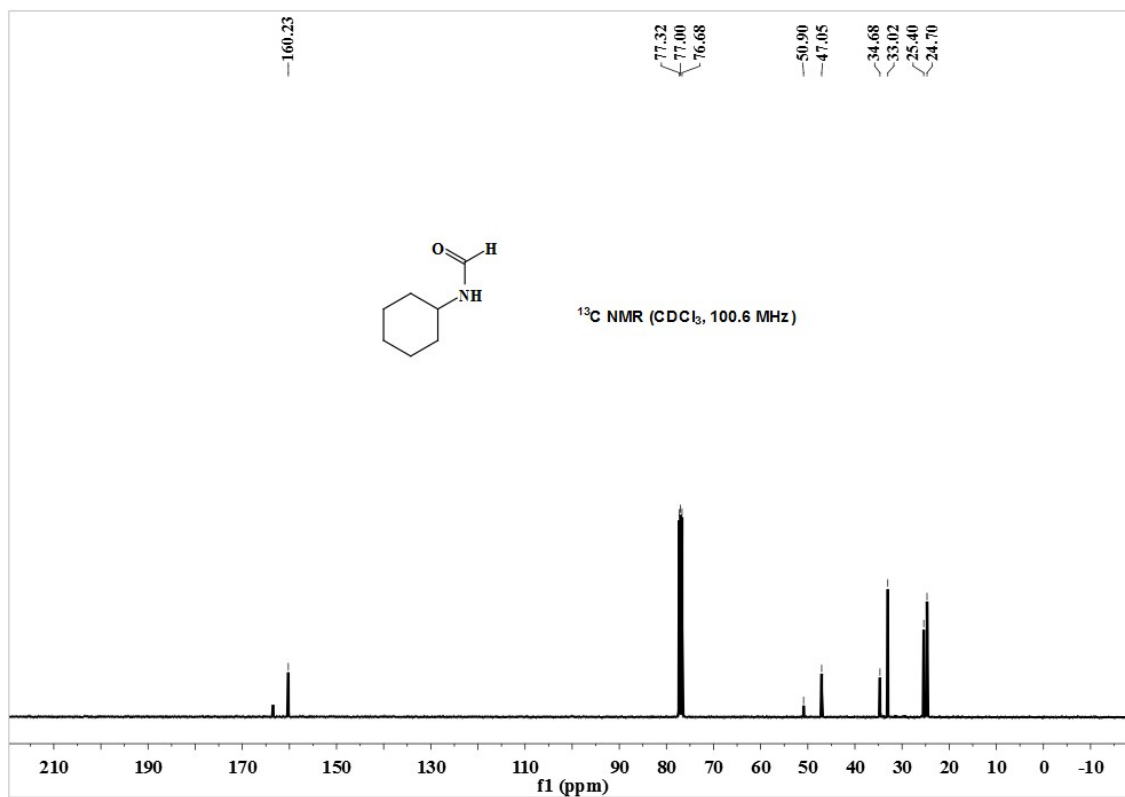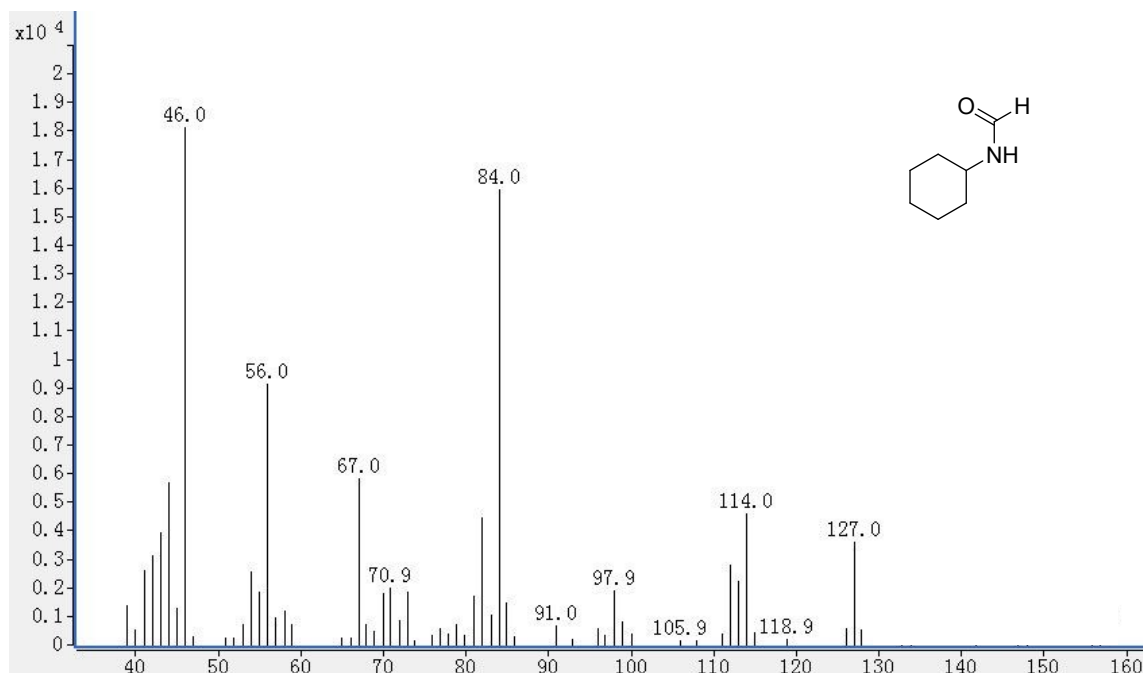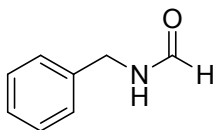

**2i**; N-benzylformamide; Purification by column chromatography on silica gel using n-hexane/ ethyl acetate (50:1) as eluent. Light yellow liquid;  $^1\text{H}$  NMR ( $\text{CDCl}_3$ , 400 MHz)  $\delta$  4.42 (d,  $^3J = 8$  Hz, 2H), 6.39 (s, 1H), 7.24-7.32 (m, 5H), 8.17 (s, 1H);  $^{13}\text{C}$  NMR ( $\text{CDCl}_3$ , 100.6 MHz)  $\delta$

42.11, 127.63, 127.75, 128.75, 137.67, 161.22. M (C<sub>8</sub>H<sub>9</sub>NO) = 135.1, EI-MS found 135.0 [M], 106.0 [M-CHO].

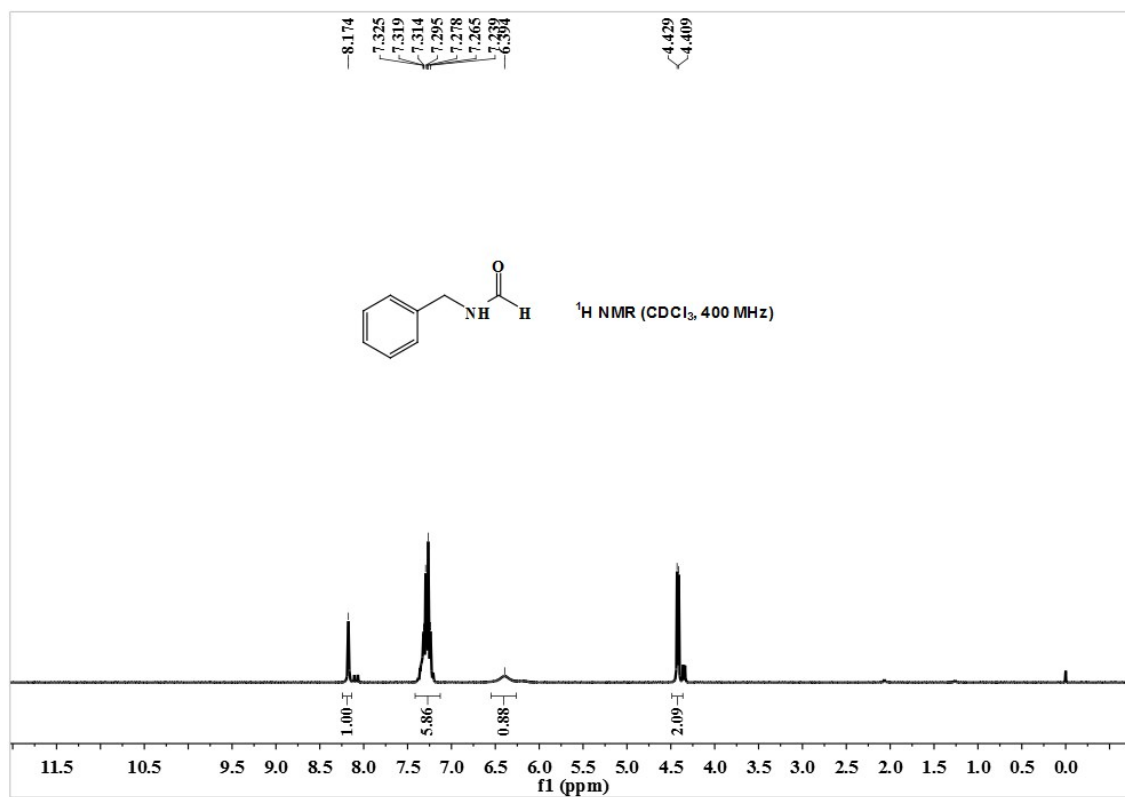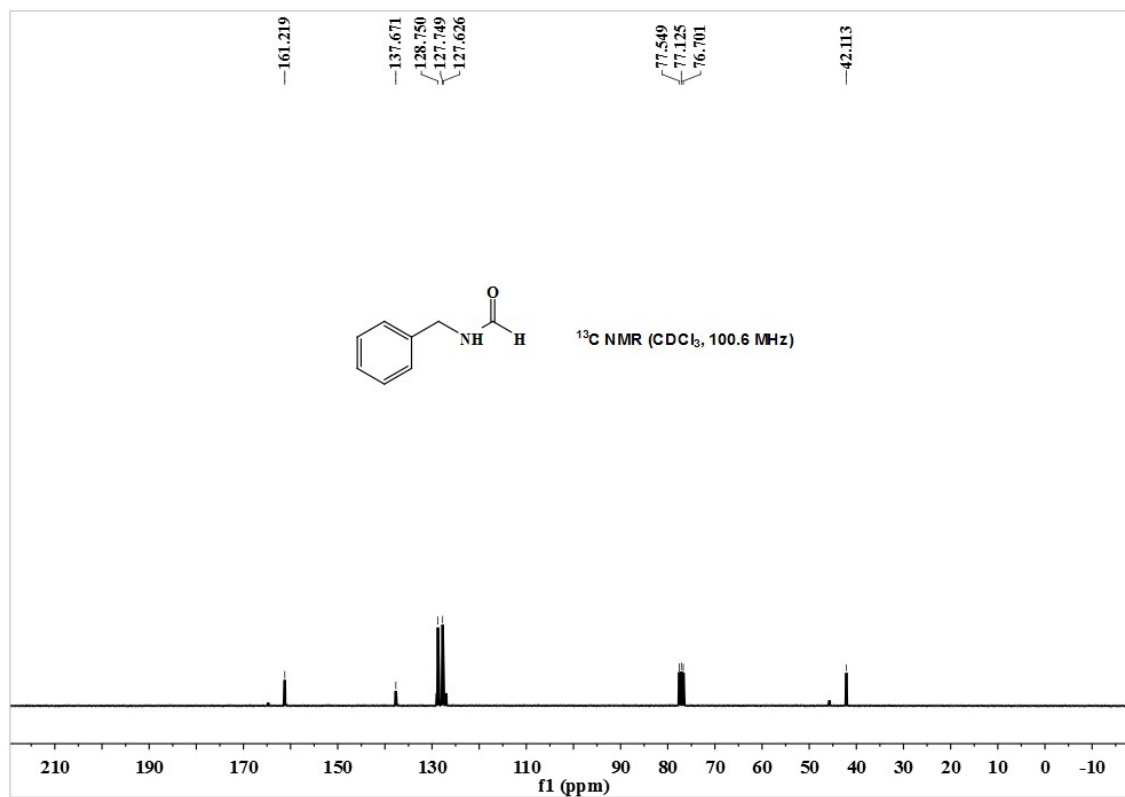

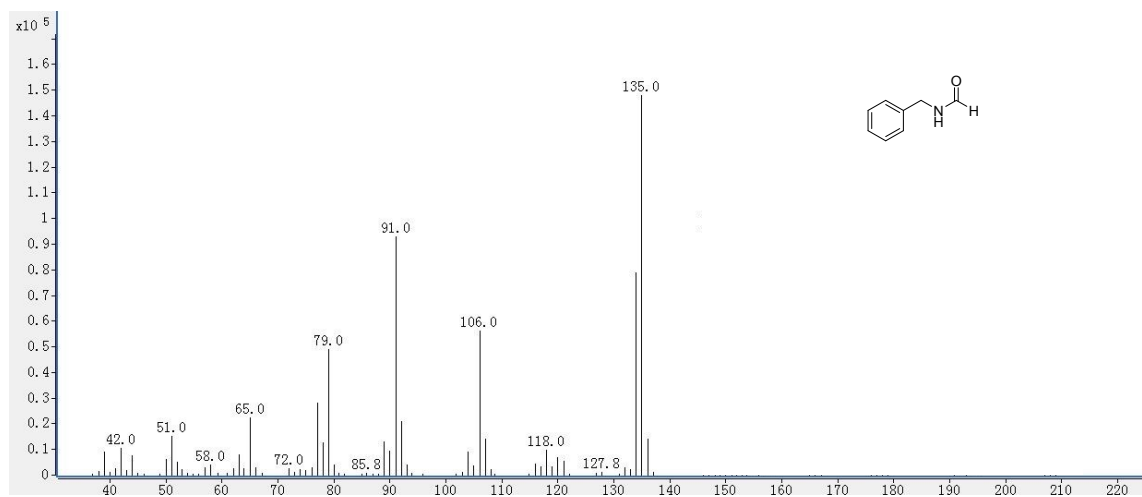

Supplement: c8cc03346c1.pdf [file c8cc03346c1.pdf]
